# Supplementary material for: The influence of numbers and ligation positions of the triphenylamine unit on the photophysical and electroluminescent properties of homoleptic iridium(iii) complexes: a theoretical perspective
Source: Royal Society of Chemistry journal article supplement (doi:10.1039/c4dt01049c), 2014-05-20
Supplement: c4dt01049c1.pdf [file c4dt01049c1.pdf]

**The Influence of Numbers and Ligation Positions of  
Triphenylamine Unit on the Photophysical and Electroluminescent  
Properties of Homoleptic Iridium(III) Complexes: A Theoretical  
Perspective**

Yuqi Liu,<sup>a</sup> Xiaobo Sun,<sup>b</sup> Ying Wang,<sup>\*a</sup> and Zhijian Wu<sup>\*a</sup>

<sup>a</sup> State Key Laboratory of Rare Earth Resource Utilization, Changchun Institute of Applied Chemistry, Chinese Academy of Sciences, Changchun 130022, People's Republic of China.

<sup>b</sup> Department of Applied Chemistry, Qingdao Agricultural University, Qingdao 266109, People's Republic of China.

\* Corresponding authors. Email: [ywang\\_2012@ciac.jl.cn](mailto:ywang_2012@ciac.jl.cn) (YW), [zjwu@ciac.jl.cn](mailto:zjwu@ciac.jl.cn) (ZJW);

*Tel:* +86-431-85682801

## The method for calculating the MLCT contribution in T<sub>1</sub> state:

The MLCT contribution in T<sub>1</sub> state in our work was calculated according to Chou's work [Inorg. Chem., 2007, **46**, 10276, Ref.54]. In that study, the CT character in the HOMO-*x*→LUMO+*y* transitions is expressed as follows:

$$CT(M) = \% (M)_{HOMO-x} - \% (M)_{LUMO+y} \quad (1)$$

where  $\% (M)_{HOMO-x}$  and  $\% (M)_{LUMO+y}$  are electronic densities on the metal in orbitals HOMO-*x* and LUMO+*y*. If the excited state is formed by more than one one-electron excitation, then the metal charge transfer (CT) character of this excited-state can be calculated as a sum of CT characters of each participating excitation, *i*→*j*:

$$CT_l(M) = \sum [C_l(i \rightarrow j)]^2 (\% (M)_i - \% (M)_j) \quad (2)$$

where  $C_l(i \rightarrow j)$  is the appropriate coefficient of the *l*th eigenvector of the CT matrix. Therefore, one can use the MO compositions in terms of fragment orbital contributions to probe the nature of electronic transitions.

**Table S1** Frontier molecular orbital energies (eV) and compositions (%) of different fragments in the ground state for complex **Ir(ppy)<sub>3</sub>**

| MO <sup>a</sup> | Energy/eV | MO composition(%) <sup>b</sup> |                  |                  |                  | Assign                                       |
|-----------------|-----------|--------------------------------|------------------|------------------|------------------|----------------------------------------------|
|                 |           | Ir                             | ppy <sub>1</sub> | ppy <sub>2</sub> | ppy <sub>3</sub> |                                              |
| L+10            | 1.57      | 2                              | 29               | 7                | 63               | π*[ppy <sub>1</sub> +ppy <sub>3</sub> ]      |
| L+9             | 1.43      | 2                              | 33               | 33               | 33               | π*[ppy]                                      |
| L+8             | 1.10      | 5                              | 59               | 30               | 6                | π*[ppy <sub>1</sub> +ppy <sub>2</sub> ]      |
| L+7             | 1.10      | 5                              | 4                | 33               | 57               | π*[ppy <sub>2</sub> +ppy <sub>3</sub> ]      |
| L+6             | 0.95      | 3                              | 32               | 33               | 32               | π*[ppy]                                      |
| L+5             | -0.48     | 2                              | 50               | 48               | 0                | π*[ppy <sub>1</sub> +ppy <sub>2</sub> ]      |
| L+4             | -0.48     | 2                              | 15               | 18               | 65               | π*[ppy]                                      |
| L+3             | -0.74     | 2                              | 33               | 33               | 33               | π*[ppy]                                      |
| L+2             | -0.99     | 5                              | 45               | 50               | 1                | π*[ppy <sub>1</sub> +ppy <sub>2</sub> ]      |
| L+1             | -0.99     | 5                              | 19               | 14               | 63               | π*[ppy]                                      |
| L               | -1.09     | 1                              | 33               | 33               | 33               | π*[ppy]                                      |
| H               | -5.12     | 48                             | 17               | 17               | 17               | d(Ir)+π[ppy]                                 |
| H-1             | -5.25     | 40                             | 35               | 8                | 18               | d(Ir)+π[ppy <sub>1</sub> +ppy <sub>3</sub> ] |
| H-2             | -5.26     | 40                             | 5                | 33               | 22               | d(Ir)+π[ppy <sub>2</sub> +ppy <sub>3</sub> ] |
| H-3             | -6.11     | 3                              | 7                | 30               | 60               | π[ppy <sub>2</sub> +ppy <sub>3</sub> ]       |
| H-4             | -6.11     | 3                              | 58               | 35               | 4                | π[ppy <sub>1</sub> +ppy <sub>2</sub> ]       |
| H-5             | -6.22     | 2                              | 32               | 33               | 32               | π[ppy]                                       |
| H-6             | -6.77     | 22                             | 26               | 26               | 26               | d(Ir)+π[ppy]                                 |
| H-7             | -6.90     | 31                             | 9                | 22               | 38               | d(Ir)+π[ppy <sub>2</sub> +ppy <sub>3</sub> ] |
| H-8             | -6.90     | 31                             | 37               | 24               | 8                | d(Ir)+π[ppy <sub>1</sub> +ppy <sub>2</sub> ] |
| H-9             | -7.00     | 15                             | 29               | 28               | 28               | d(Ir)+π[ppy]                                 |
| H-10            | -7.42     | 13                             | 12               | 38               | 38               | d(Ir)+π[ppy]                                 |

<sup>a</sup> H = HOMO; L= LUMO; ppy<sub>1</sub>, ppy<sub>2</sub> and ppy<sub>3</sub> are the same ligands, but in different positions,

Figure 1.

**Table S2** Frontier molecular orbital energies (eV) and compositions (%) of different fragments in the ground state for complex **1a**

| MO <sup>a</sup> | Energy/eV | MO composition(%) <sup>b</sup> |                                 |                                 | Assign |                                              |
|-----------------|-----------|--------------------------------|---------------------------------|---------------------------------|--------|----------------------------------------------|
|                 |           | Ir                             | (C <sup>^</sup> N) <sub>1</sub> | (C <sup>^</sup> N) <sub>2</sub> |        | (C <sup>^</sup> N) <sub>3</sub>              |
| L+10            | -0.15     | 1                              | 89                              | 0                               | 10     | $\pi^*[(C^{\wedge}N)_1]$                     |
| L+9             | -0.18     | 1                              | 10                              | 1                               | 88     | $\pi^*[(C^{\wedge}N)_3]$                     |
| L+8             | -0.34     | 0                              | 4                               | 95                              | 0      | $\pi^*[(C^{\wedge}N)_2]$                     |
| L+7             | -0.36     | 0                              | 69                              | 3                               | 28     | $\pi^*[(C^{\wedge}N)_1+(C^{\wedge}N)_3]$     |
| L+6             | -0.37     | 0                              | 25                              | 4                               | 70     | $\pi^*[(C^{\wedge}N)_1+(C^{\wedge}N)_3]$     |
| L+5             | -0.49     | 1                              | 17                              | 75                              | 8      | $\pi^*[(C^{\wedge}N)_1+(C^{\wedge}N)_2]$     |
| L+4             | -0.56     | 1                              | 53                              | 2                               | 44     | $\pi^*[(C^{\wedge}N)_1+(C^{\wedge}N)_3]$     |
| L+3             | -0.75     | 1                              | 31                              | 19                              | 49     | $\pi^*[(C^{\wedge}N)]$                       |
| L+2             | -1.13     | 4                              | 22                              | 68                              | 7      | $\pi^*[(C^{\wedge}N)_1+(C^{\wedge}N)_2]$     |
| L+1             | -1.15     | 4                              | 51                              | 5                               | 40     | $\pi^*[(C^{\wedge}N)_1+(C^{\wedge}N)_3]$     |
| L               | -1.21     | 1                              | 24                              | 25                              | 50     | $\pi^*[(C^{\wedge}N)]$                       |
| H               | -5.01     | 47                             | 17                              | 23                              | 13     | $d(Ir)+\pi[(C^{\wedge}N)]$                   |
| H-1             | -5.11     | 40                             | 29                              | 27                              | 5      | $d(Ir)+\pi[(C^{\wedge}N)_1+(C^{\wedge}N)_2]$ |
| H-2             | -5.13     | 41                             | 11                              | 11                              | 36     | $d(Ir)+\pi[(C^{\wedge}N)]$                   |
| H-3             | -5.26     | 1                              | 0                               | 98                              | 1      | $\pi[(C^{\wedge}N)_2]$                       |
| H-4             | -5.42     | 0                              | 100                             | 0                               | 0      | $\pi[(C^{\wedge}N)_1]$                       |
| H-5             | -5.43     | 0                              | 0                               | 0                               | 100    | $\pi[(C^{\wedge}N)_3]$                       |
| H-6             | -5.97     | 3                              | 24                              | 70                              | 3      | $\pi[(C^{\wedge}N)_1+(C^{\wedge}N)_2]$       |
| H-7             | -6.01     | 3                              | 54                              | 14                              | 30     | $\pi[(C^{\wedge}N)]$                         |
| H-8             | -6.12     | 3                              | 19                              | 15                              | 63     | $\pi[(C^{\wedge}N)]$                         |
| H-9             | -6.62     | 19                             | 27                              | 32                              | 22     | $d(Ir)+\pi[(C^{\wedge}N)]$                   |
| H-10            | -6.67     | 16                             | 12                              | 55                              | 18     | $d(Ir)+\pi[(C^{\wedge}N)]$                   |

<sup>a</sup> H = HOMO; L= LUMO; <sup>b</sup> (C<sup>^</sup>N)<sub>1</sub>, (C<sup>^</sup>N)<sub>2</sub> and (C<sup>^</sup>N)<sub>3</sub> are the same ligands, but in different positions,

Figure 1.

**Table S3** Frontier molecular orbital energies (eV) and compositions (%) of different fragments in the ground state for complex **1b**

| MO <sup>a</sup> | Energy/eV | MO composition(%) <sup>b</sup> |                                 |                                 | Assign |                                              |
|-----------------|-----------|--------------------------------|---------------------------------|---------------------------------|--------|----------------------------------------------|
|                 |           | Ir                             | (C <sup>^</sup> N) <sub>1</sub> | (C <sup>^</sup> N) <sub>2</sub> |        | (C <sup>^</sup> N) <sub>3</sub>              |
| L+10            | -0.25     | 0                              | 0                               | 0                               | 100    | $\pi^*[(C^{\wedge}N)_3]$                     |
| L+9             | -0.25     | 0                              | 0                               | 100                             | 0      | $\pi^*[(C^{\wedge}N)_2]$                     |
| L+8             | -0.33     | 0                              | 57                              | 0                               | 43     | $\pi^*[(C^{\wedge}N)_1+(C^{\wedge}N)_3]$     |
| L+7             | -0.33     | 0                              | 43                              | 1                               | 56     | $\pi^*[(C^{\wedge}N)_1+(C^{\wedge}N)_3]$     |
| L+6             | -0.36     | 0                              | 1                               | 99                              | 1      | $\pi^*[(C^{\wedge}N)_2]$                     |
| L+5             | -0.54     | 1                              | 50                              | 48                              | 0      | $\pi^*[(C^{\wedge}N)_1+(C^{\wedge}N)_2]$     |
| L+4             | -0.55     | 1                              | 15                              | 18                              | 66     | $\pi^*[(C^{\wedge}N)]$                       |
| L+3             | -0.77     | 2                              | 34                              | 32                              | 32     | $\pi^*[(C^{\wedge}N)]$                       |
| L+2             | -1.24     | 4                              | 61                              | 5                               | 31     | $\pi^*[(C^{\wedge}N)_1+(C^{\wedge}N)_3]$     |
| L+1             | -1.24     | 4                              | 5                               | 56                              | 35     | $\pi^*[(C^{\wedge}N)_2+(C^{\wedge}N)_3]$     |
| L               | -1.30     | 1                              | 31                              | 36                              | 32     | $\pi^*[(C^{\wedge}N)]$                       |
| H               | -5.01     | 48                             | 17                              | 17                              | 18     | $d(Ir)+\pi[(C^{\wedge}N)]$                   |
| H-1             | -5.13     | 40                             | 6                               | 22                              | 32     | $d(Ir)+\pi[(C^{\wedge}N)_2+(C^{\wedge}N)_3]$ |
| H-2             | -5.13     | 40                             | 34                              | 19                              | 7      | $d(Ir)+\pi[(C^{\wedge}N)_1+(C^{\wedge}N)_2]$ |
| H-3             | -5.34     | 0                              | 99                              | 0                               | 1      | $\pi[(C^{\wedge}N)_1]$                       |
| H-4             | -5.35     | 0                              | 1                               | 2                               | 97     | $\pi[(C^{\wedge}N)_3]$                       |
| H-5             | -5.35     | 0                              | 0                               | 97                              | 2      | $\pi[(C^{\wedge}N)_2]$                       |
| H-6             | -6.01     | 3                              | 31                              | 5                               | 61     | $\pi[(C^{\wedge}N)_1+(C^{\wedge}N)_3]$       |
| H-7             | -6.01     | 3                              | 31                              | 61                              | 5      | $\pi[(C^{\wedge}N)_1+(C^{\wedge}N)_2]$       |
| H-8             | -6.12     | 3                              | 35                              | 32                              | 31     | $\pi[(C^{\wedge}N)]$                         |
| H-9             | -6.58     | 15                             | 30                              | 25                              | 29     | $d(Ir)+\pi[(C^{\wedge}N)]$                   |
| H-10            | -6.62     | 15                             | 21                              | 17                              | 47     | $d(Ir)+\pi[(C^{\wedge}N)]$                   |

<sup>a</sup> H = HOMO; L = LUMO; <sup>b</sup> (C<sup>^</sup>N)<sub>1</sub>, (C<sup>^</sup>N)<sub>2</sub> and (C<sup>^</sup>N)<sub>3</sub> are the same ligands, but in different positions,

Figure 1.

**Table S4** Frontier molecular orbital energies (eV) and compositions (%) of different fragments in the ground state for complex **1c**

| MO <sup>a</sup> | Energy/eV | MO composition(%) <sup>b</sup> |                                 |                                 | Assign |                                              |
|-----------------|-----------|--------------------------------|---------------------------------|---------------------------------|--------|----------------------------------------------|
|                 |           | Ir                             | (C <sup>^</sup> N) <sub>1</sub> | (C <sup>^</sup> N) <sub>2</sub> |        | (C <sup>^</sup> N) <sub>3</sub>              |
| L+10            | -0.28     | 0                              | 0                               | 98                              | 2      | $\pi^*[(C^{\wedge}N)_2]$                     |
| L+9             | -0.28     | 0                              | 0                               | 2                               | 98     | $\pi^*[(C^{\wedge}N)_3]$                     |
| L+8             | -0.36     | 0                              | 84                              | 8                               | 8      | $\pi^*[(C^{\wedge}N)_1]$                     |
| L+7             | -0.37     | 0                              | 0                               | 51                              | 48     | $\pi^*[(C^{\wedge}N)_2+(C^{\wedge}N)_3]$     |
| L+6             | -0.38     | 0                              | 15                              | 41                              | 44     | $\pi^*[(C^{\wedge}N)]$                       |
| L+5             | -0.50     | 1                              | 48                              | 51                              | 0      | $\pi^*[(C^{\wedge}N)_1+(C^{\wedge}N)_2]$     |
| L+4             | -0.51     | 1                              | 20                              | 15                              | 65     | $\pi^*[(C^{\wedge}N)]$                       |
| L+3             | -0.71     | 1                              | 32                              | 33                              | 34     | $\pi^*[(C^{\wedge}N)]$                       |
| L+2             | -1.21     | 4                              | 69                              | 23                              | 5      | $\pi^*[(C^{\wedge}N)_1+(C^{\wedge}N)_2]$     |
| L+1             | -1.22     | 4                              | 5                               | 43                              | 48     | $\pi^*[(C^{\wedge}N)_2+(C^{\wedge}N)_3]$     |
| L               | -1.28     | 1                              | 24                              | 31                              | 44     | $\pi^*[(C^{\wedge}N)]$                       |
| H               | -4.94     | 47                             | 19                              | 16                              | 18     | $d(Ir)+\pi[(C^{\wedge}N)]$                   |
| H-1             | -5.04     | 38                             | 33                              | 18                              | 11     | $d(Ir)+\pi[(C^{\wedge}N)]$                   |
| H-2             | -5.04     | 38                             | 8                               | 25                              | 29     | $d(Ir)+\pi[(C^{\wedge}N)_2+(C^{\wedge}N)_3]$ |
| H-3             | -5.35     | 1                              | 48                              | 28                              | 23     | $\pi[(C^{\wedge}N)]$                         |
| H-4             | -5.37     | 2                              | 45                              | 41                              | 12     | $\pi[(C^{\wedge}N)]$                         |
| H-5             | -5.37     | 2                              | 6                               | 29                              | 63     | $\pi[(C^{\wedge}N)_2+(C^{\wedge}N)_3]$       |
| H-6             | -5.95     | 3                              | 65                              | 18                              | 14     | $\pi[(C^{\wedge}N)]$                         |
| H-7             | -5.96     | 3                              | 2                               | 46                              | 50     | $\pi[(C^{\wedge}N)_2+(C^{\wedge}N)_3]$       |
| H-8             | -6.06     | 3                              | 31                              | 33                              | 34     | $\pi[(C^{\wedge}N)]$                         |
| H-9             | -6.58     | 19                             | 27                              | 27                              | 26     | $d(Ir)+\pi[(C^{\wedge}N)]$                   |
| H-10            | -6.65     | 21                             | 29                              | 10                              | 40     | $d(Ir)+\pi[(C^{\wedge}N)]$                   |

<sup>a</sup> H = HOMO; L= LUMO; <sup>b</sup> (C<sup>^</sup>N)<sub>1</sub>, (C<sup>^</sup>N)<sub>2</sub> and (C<sup>^</sup>N)<sub>3</sub> are the same ligands, but in different positions,

Figure 1.

**Table S5** Frontier molecular orbital energies (eV) and compositions (%) of different fragments in the ground state for complex **2a**

| MO <sup>a</sup> | Energy/eV | MO composition(%) <sup>b</sup> |                                 |                                 | Assign |                                              |
|-----------------|-----------|--------------------------------|---------------------------------|---------------------------------|--------|----------------------------------------------|
|                 |           | Ir                             | (C <sup>^</sup> N) <sub>1</sub> | (C <sup>^</sup> N) <sub>2</sub> |        | (C <sup>^</sup> N) <sub>3</sub>              |
| L+10            | -0.13     | 1                              | 21                              | 2                               | 77     | $\pi^*[(C^{\wedge}N)_1+(C^{\wedge}N)_3]$     |
| L+9             | -0.16     | 0                              | 79                              | 2                               | 19     | $\pi^*[(C^{\wedge}N)_1+(C^{\wedge}N)_3]$     |
| L+8             | -0.29     | 0                              | 0                               | 99                              | 1      | $\pi^*[(C^{\wedge}N)_2]$                     |
| L+7             | -0.33     | 0                              | 0                               | 1                               | 99     | $\pi^*[(C^{\wedge}N)_3]$                     |
| L+6             | -0.38     | 0                              | 100                             | 0                               | 0      | $\pi^*[(C^{\wedge}N)_1]$                     |
| L+5             | -0.59     | 1                              | 26                              | 71                              | 3      | $\pi^*[(C^{\wedge}N)_1+(C^{\wedge}N)_2]$     |
| L+4             | -0.62     | 1                              | 27                              | 3                               | 69     | $\pi^*[(C^{\wedge}N)_1+(C^{\wedge}N)_3]$     |
| L+3             | -0.85     | 1                              | 46                              | 25                              | 28     | $\pi^*[(C^{\wedge}N)]$                       |
| L+2             | -1.23     | 4                              | 1                               | 6                               | 89     | $\pi^*[(C^{\wedge}N)_3]$                     |
| L+1             | -1.28     | 4                              | 24                              | 69                              | 3      | $\pi^*[(C^{\wedge}N)_1+(C^{\wedge}N)_2]$     |
| L               | -1.40     | 2                              | 72                              | 22                              | 4      | $\pi^*[(C^{\wedge}N)_1+(C^{\wedge}N)_2]$     |
| H               | -5.10     | 9                              | 5                               | 84                              | 1      | $\pi[(C^{\wedge}N)_2]$                       |
| H-1             | -5.12     | 14                             | 79                              | 4                               | 3      | $d(Ir)+\pi[(C^{\wedge}N)_1]$                 |
| H-2             | -5.17     | 23                             | 8                               | 16                              | 53     | $d(Ir)+\pi[(C^{\wedge}N)_2+(C^{\wedge}N)_3]$ |
| H-3             | -5.23     | 0                              | 2                               | 78                              | 19     | $\pi[(C^{\wedge}N)_2+(C^{\wedge}N)_3]$       |
| H-4             | -5.27     | 17                             | 12                              | 32                              | 39     | $d(Ir)+\pi[(C^{\wedge}N)]$                   |
| H-5             | -5.34     | 1                              | 1                               | 0                               | 97     | $\pi[(C^{\wedge}N)_3]$                       |
| H-6             | -5.39     | 28                             | 50                              | 15                              | 7      | $d(Ir)+\pi[(C^{\wedge}N)_1+(C^{\wedge}N)_2]$ |
| H-7             | -5.40     | 34                             | 7                               | 25                              | 34     | $d(Ir)+\pi[(C^{\wedge}N)_2+(C^{\wedge}N)_3]$ |
| H-8             | -5.48     | 5                              | 92                              | 2                               | 1      | $\pi[(C^{\wedge}N)_1]$                       |
| H-9             | -6.24     | 5                              | 4                               | 68                              | 23     | $\pi[(C^{\wedge}N)_2+(C^{\wedge}N)_3]$       |
| H-10            | -6.28     | 6                              | 31                              | 12                              | 52     | $\pi[(C^{\wedge}N)]$                         |

<sup>a</sup> H = HOMO; L= LUMO; <sup>b</sup> (C<sup>^</sup>N)<sub>1</sub>, (C<sup>^</sup>N)<sub>2</sub> and (C<sup>^</sup>N)<sub>3</sub> are the same ligands, but in different positions,

Figure 1.

**Table S6** Frontier molecular orbital energies (eV) and compositions (%) of different fragments in the ground state for complex **2b**

| MO <sup>a</sup> | Energy/eV | MO composition(%) <sup>b</sup> |                                 |                                 | Assign |                                          |
|-----------------|-----------|--------------------------------|---------------------------------|---------------------------------|--------|------------------------------------------|
|                 |           | Ir                             | (C <sup>^</sup> N) <sub>1</sub> | (C <sup>^</sup> N) <sub>2</sub> |        | (C <sup>^</sup> N) <sub>3</sub>          |
| L+17            | 0.17      | 0                              | 1                               | 48                              | 51     | $\pi^*[(C^{\wedge}N)_2+(C^{\wedge}N)_3]$ |
| L+16            | 0.16      | 0                              | 1                               | 96                              | 3      | $\pi^*[(C^{\wedge}N)_2]$                 |
| L+15            | 0.14      | 0                              | 96                              | 1                               | 3      | $\pi^*[(C^{\wedge}N)_1]$                 |
| L+7             | -0.42     | 0                              | 35                              | 39                              | 26     | $\pi^*[(C^{\wedge}N)]$                   |
| L+6             | -0.42     | 0                              | 34                              | 27                              | 38     | $\pi^*[(C^{\wedge}N)]$                   |
| L+5             | -0.72     | 0                              | 37                              | 9                               | 54     | $\pi^*[(C^{\wedge}N)_1+(C^{\wedge}N)_3]$ |
| L+4             | -0.74     | 2                              | 26                              | 47                              | 26     | $\pi^*[(C^{\wedge}N)]$                   |
| L+3             | -0.96     | 0                              | 38                              | 24                              | 37     | $\pi^*[(C^{\wedge}N)]$                   |
| L+2             | -1.38     | 1                              | 7                               | 39                              | 53     | $\pi^*[(C^{\wedge}N)_2+(C^{\wedge}N)_3]$ |
| L+1             | -1.40     | 3                              | 38                              | 41                              | 18     | $\pi^*[(C^{\wedge}N)]$                   |
| L               | -1.45     | 2                              | 37                              | 36                              | 25     | $\pi^*[(C^{\wedge}N)]$                   |
| H               | -4.65     | 0                              | 12                              | 51                              | 37     | $\pi[(C^{\wedge}N)]$                     |
| H-1             | -4.67     | 0                              | 39                              | 37                              | 24     | $\pi[(C^{\wedge}N)]$                     |
| H-2             | -4.71     | 0                              | 64                              | 23                              | 13     | $\pi[(C^{\wedge}N)]$                     |
| H-3             | -5.40     | 0                              | 27                              | 18                              | 55     | $\pi[(C^{\wedge}N)]$                     |
| H-4             | -5.40     | 0                              | 57                              | 25                              | 18     | $\pi[(C^{\wedge}N)]$                     |
| H-5             | -5.40     | 0                              | 23                              | 51                              | 25     | $\pi[(C^{\wedge}N)]$                     |
| H-6             | -5.56     | 0                              | 22                              | 62                              | 16     | $\pi[(C^{\wedge}N)]$                     |
| H-7             | -5.68     | 0                              | 18                              | 62                              | 20     | $\pi[(C^{\wedge}N)]$                     |
| H-8             | -5.70     | 0                              | 30                              | 55                              | 15     | $\pi[(C^{\wedge}N)]$                     |
| H-9             | -6.23     | 0                              | 11                              | 47                              | 41     | $\pi[(C^{\wedge}N)]$                     |
| H-10            | -6.24     | 0                              | 59                              | 23                              | 18     | $\pi[(C^{\wedge}N)]$                     |

<sup>a</sup> H = HOMO; L= LUMO; <sup>b</sup> (C<sup>^</sup>N)<sub>1</sub>, (C<sup>^</sup>N)<sub>2</sub> and (C<sup>^</sup>N)<sub>3</sub> are the same ligands, but in different positions,

Figure 1.



**Table S7** Frontier molecular orbital energies (eV) and compositions (%) of different fragments in the ground state for complex **2c**

| MO <sup>a</sup> | Energy/eV | MO composition(%) <sup>b</sup> |                                 |                                 | Assign |                                          |
|-----------------|-----------|--------------------------------|---------------------------------|---------------------------------|--------|------------------------------------------|
|                 |           | Ir                             | (C <sup>^</sup> N) <sub>1</sub> | (C <sup>^</sup> N) <sub>2</sub> |        | (C <sup>^</sup> N) <sub>3</sub>          |
| L+13            | 0.12      | 1                              | 42                              | 27                              | 31     | $\pi^*[(C^{\wedge}N)]$                   |
| L+12            | 0.07      | 1                              | 17                              | 61                              | 21     | $\pi^*[(C^{\wedge}N)]$                   |
| L+8             | -0.35     | 0                              | 39                              | 4                               | 57     | $\pi^*[(C^{\wedge}N)_1+(C^{\wedge}N)_3]$ |
| L+7             | -0.39     | 0                              | 65                              | 1                               | 34     | $\pi^*[(C^{\wedge}N)_1+(C^{\wedge}N)_3]$ |
| L+6             | -0.41     | 0                              | 1                               | 94                              | 5      | $\pi^*[(C^{\wedge}N)_2]$                 |
| L+5             | -0.53     | 1                              | 59                              | 6                               | 34     | $\pi^*[(C^{\wedge}N)_1+(C^{\wedge}N)_3]$ |
| L+4             | -0.55     | 1                              | 15                              | 41                              | 43     | $\pi^*[(C^{\wedge}N)]$                   |
| L+3             | -0.77     | 2                              | 24                              | 55                              | 20     | $\pi^*[(C^{\wedge}N)]$                   |
| L+2             | -1.19     | 3                              | 30                              | 5                               | 61     | $\pi^*[(C^{\wedge}N)_1+(C^{\wedge}N)_3]$ |
| L+1             | -1.2      | 3                              | 51                              | 10                              | 36     | $\pi^*[(C^{\wedge}N)]$                   |
| L               | -1.28     | 2                              | 6                               | 86                              | 6      | $\pi^*[(C^{\wedge}N)_2]$                 |
| H               | -4.64     | 4                              | 60                              | 12                              | 24     | $\pi[(C^{\wedge}N)]$                     |
| H-1             | -4.66     | 4                              | 46                              | 11                              | 39     | $\pi[(C^{\wedge}N)]$                     |
| H-2             | -4.69     | 1                              | 39                              | 53                              | 7      | $\pi[(C^{\wedge}N)_1+(C^{\wedge}N)_2]$   |
| H-3             | -5.08     | 42                             | 27                              | 12                              | 19     | $d(Ir)+\pi[(C^{\wedge}N)]$               |
| H-4             | -5.16     | 36                             | 12                              | 26                              | 27     | $d(Ir)+\pi[(C^{\wedge}N)]$               |
| H-5             | -5.17     | 34                             | 26                              | 18                              | 23     | $d(Ir)+\pi[(C^{\wedge}N)]$               |
| H-6             | -5.36     | 6                              | 20                              | 24                              | 50     | $\pi[(C^{\wedge}N)]$                     |
| H-7             | -5.38     | 7                              | 37                              | 29                              | 27     | $\pi[(C^{\wedge}N)]$                     |
| H-8             | -5.4      | 6                              | 7                               | 51                              | 37     | $\pi[(C^{\wedge}N)_2+(C^{\wedge}N)_3]$   |
| H-9             | -6.28     | 1                              | 39                              | 46                              | 14     | $\pi[(C^{\wedge}N)]$                     |
| H-10            | -6.31     | 1                              | 32                              | 51                              | 16     | $\pi[(C^{\wedge}N)]$                     |

<sup>a</sup> H = HOMO; L= LUMO; <sup>b</sup> (C<sup>^</sup>N)<sub>1</sub>, (C<sup>^</sup>N)<sub>2</sub> and (C<sup>^</sup>N)<sub>3</sub> are the same ligands, but in different positions,

Figure 1.

**Table S8** Selected calculated wavelength ( $\lambda$ , in nm)/energies ( $E$ , in eV), oscillator strength ( $f$ ), major contribution and transition characters for the studied complexes in toluene media, along with the experimental data for **2b** and **2c**

|                            | state           | $\lambda/E$    | $f$          | Configuration <sup>a</sup>                                                 | Assignment                                                                                                | Exptl <sup>b</sup>                                                      |  |
|----------------------------|-----------------|----------------|--------------|----------------------------------------------------------------------------|-----------------------------------------------------------------------------------------------------------|-------------------------------------------------------------------------|--|
| <b>Ir(ppy)<sub>3</sub></b> | S <sub>1</sub>  | 398/3.11       | 0.0172       | H→L(95%)                                                                   | d(Ir)+π[ppy]→π*[ppy]/MLCT/LLCT/IL                                                                         |                                                                         |  |
|                            | S <sub>4</sub>  | 371/3.34       | 0.0626       | H-1→L(91%)                                                                 | d(Ir)+π[ppy <sub>1</sub> +ppy <sub>3</sub> ]→π*[ppy]/MLCT/LLCT/IL                                         |                                                                         |  |
|                            | S <sub>5</sub>  | 371/3.34       | 0.0624       | H-2→L(91%)                                                                 | d(Ir)+π[ppy <sub>2</sub> +ppy <sub>3</sub> ]→π*[ppy]/MLCT/LLCT/IL                                         |                                                                         |  |
|                            | S <sub>7</sub>  | 362/3.43       | 0.0628       | H-1→L+1(40%)                                                               | d(Ir)+π[ppy <sub>1</sub> +ppy <sub>3</sub> ]→π*[ppy]/MLCT/LLCT/IL                                         |                                                                         |  |
|                            |                 |                |              | H-2→L+2(39%)                                                               | d(Ir)+π[ppy <sub>2</sub> +ppy <sub>3</sub> ]→π*[ppy <sub>1</sub> +ppy <sub>2</sub> ]/MLCT/LLCT/IL         |                                                                         |  |
|                            | S <sub>8</sub>  | 362/3.43       | 0.0627       | H-1→L+2(40%)                                                               | d(Ir)+π[ppy <sub>1</sub> +ppy <sub>3</sub> ]→π*[ppy <sub>1</sub> +ppy <sub>2</sub> ]/MLCT/LLCT/IL         |                                                                         |  |
|                            |                 |                |              | H-2→L+1(39%)                                                               | d(Ir)+π[ppy <sub>2</sub> +ppy <sub>3</sub> ]→π*[ppy]/MLCT/LLCT/IL                                         |                                                                         |  |
|                            | S <sub>10</sub> | 338/3.67       | 0.0885       | H→L+3(60%)                                                                 | d(Ir)+π[ppy]→π*[ppy]/MLCT/LLCT/IL                                                                         |                                                                         |  |
|                            | S <sub>19</sub> | 283/4.38       | 0.0817       | H-3→L(78%)                                                                 | π[ppy <sub>2</sub> +ppy <sub>3</sub> ]→π*[ppy]/LLCT/IL                                                    |                                                                         |  |
|                            | S <sub>20</sub> | 283/4.39       | 0.0816       | H-4→L(78%)                                                                 | π[ppy <sub>1</sub> +ppy <sub>2</sub> ]→π*[ppy]/LLCT/IL                                                    |                                                                         |  |
|                            | S <sub>21</sub> | 278/4.45       | 0.4597       | H-4→L+1(23%)                                                               | π[ppy <sub>1</sub> +ppy <sub>2</sub> ]→π*[ppy]/LLCT/IL                                                    |                                                                         |  |
|                            |                 |                |              | H-3→L+2(23%)                                                               | π[ppy <sub>2</sub> +ppy <sub>3</sub> ]→π*[ppy <sub>1</sub> +ppy <sub>2</sub> ]/LLCT/IL                    |                                                                         |  |
|                            | S <sub>22</sub> | 277/4.48       | 0.0619       | H-3→L+1(36%)                                                               | π[ppy <sub>2</sub> +ppy <sub>3</sub> ]→π*[ppy]/LLCT/IL                                                    |                                                                         |  |
|                            |                 |                |              | H-4→L+2(35%)                                                               | π[ppy <sub>1</sub> +ppy <sub>2</sub> ]→π*[ppy <sub>1</sub> +ppy <sub>2</sub> ]/LLCT/IL                    |                                                                         |  |
|                            | S <sub>23</sub> | 277/4.48       | 0.0619       | H-4→L+1(36%)                                                               | π[ppy <sub>1</sub> +ppy <sub>2</sub> ]→π*[ppy]/LLCT/IL                                                    |                                                                         |  |
|                            |                 |                |              | H-3→L+2(35%)                                                               | π[ppy <sub>2</sub> +ppy <sub>3</sub> ]→π*[ppy <sub>1</sub> +ppy <sub>2</sub> ]/LLCT/IL                    |                                                                         |  |
|                            | S <sub>31</sub> | 257/4.83       | 0.0515       | H-6→L+1(74%)                                                               | d(Ir)+π[ppy]→π*[ppy]/MLCT/LLCT/IL                                                                         |                                                                         |  |
|                            | S <sub>32</sub> | 257/4.83       | 0.0506       | H-6→L+2(74%)                                                               | d(Ir)+π[ppy]→π*[ppy <sub>1</sub> +ppy <sub>2</sub> ]/MLCT/LLCT/IL                                         |                                                                         |  |
|                            | S <sub>33</sub> | 255/4.85       | 0.0880       | H-5→L+3(60%)                                                               | π[ppy]→π*[ppy]/LLCT/IL                                                                                    |                                                                         |  |
|                            | <b>1a</b>       | S <sub>1</sub> | 415/2.99     | 0.0052                                                                     | H→L(90%)                                                                                                  | d(Ir)+π[(C^N)]→π*[(C^N)]/MLCT/LLCT/IL                                   |  |
|                            |                 | S <sub>4</sub> | 391/3.17     | 0.1110                                                                     | H-1→L(64%)                                                                                                | d(Ir)+π[(C^N) <sub>1</sub> +(C^N) <sub>2</sub> ]→π*[(C^N)]/MLCT/LLCT/IL |  |
| H-2→L(21%)                 |                 |                |              |                                                                            | d(Ir)+π[(C^N)]→π*[(C^N)]/MLCT/LLCT/IL                                                                     |                                                                         |  |
| S <sub>5</sub>             |                 | 389/3.18       | 0.1252       | H-2→L(66%)                                                                 | d(Ir)+π[(C^N)]→π*[(C^N)]/MLCT/LLCT/IL                                                                     |                                                                         |  |
|                            |                 |                |              | H-1→L(23%)                                                                 | d(Ir)+π[(C^N) <sub>1</sub> +(C^N) <sub>2</sub> ]→π*[(C^N)]/MLCT/LLCT/IL                                   |                                                                         |  |
| S <sub>7</sub>             |                 | 383/3.24       | 0.0746       | H-2→L+2(50%)                                                               | d(Ir)+π[(C^N)]→π*[(C^N) <sub>1</sub> +(C^N) <sub>2</sub> ]/MLCT/LLCT/IL                                   |                                                                         |  |
|                            |                 |                |              | H-1→L+1(21%)                                                               | d(Ir)+π[(C^N) <sub>1</sub> +(C^N) <sub>2</sub> ]→π*[(C^N) <sub>1</sub> +(C^N) <sub>3</sub> ]/MLCT/LLCT/IL |                                                                         |  |
| S <sub>8</sub>             |                 | 381/3.26       | 0.0825       | H-1→L+2(49%)                                                               | d(Ir)+π[(C^N) <sub>1</sub> +(C^N) <sub>2</sub> ]→π*[(C^N) <sub>1</sub> +(C^N) <sub>2</sub> ]/MLCT/LLCT/IL |                                                                         |  |
|                            |                 |                |              | H-2→L+1(38%)                                                               | d(Ir)+π[(C^N)]→π*[(C^N) <sub>1</sub> +(C^N) <sub>3</sub> ]/MLCT/LLCT/IL                                   |                                                                         |  |
| S <sub>9</sub>             |                 | 378/3.28       | 0.0503       | H-3→L+2(40%)                                                               | π[(C^N) <sub>2</sub> ]→π*[(C^N) <sub>1</sub> +(C^N) <sub>2</sub> ]/LLCT/IL                                |                                                                         |  |
|                            |                 |                |              | H-3→L(32%)                                                                 | π[(C^N) <sub>2</sub> ]→π*[(C^N)]/LLCT/IL                                                                  |                                                                         |  |
| S <sub>13</sub>            |                 | 349/3.56       | 0.0937       | H→L+3(75%)                                                                 | d(Ir)+π[(C^N)]→π*[(C^N)]/MLCT/LLCT/IL                                                                     |                                                                         |  |
| S <sub>19</sub>            |                 | 330/3.76       | 0.0678       | H→L+5(84%)                                                                 | d(Ir)+π[(C^N)]→π*[(C^N) <sub>1</sub> +(C^N) <sub>2</sub> ]/MLCT/LLCT/IL                                   |                                                                         |  |
| S <sub>27</sub>            |                 | 318/3.90       | 0.0557       | H-3→L+3(48%)                                                               | π[(C^N) <sub>2</sub> ]→π*[(C^N)]/LLCT/IL                                                                  |                                                                         |  |
|                            | H-3→L+5(27%)    |                |              | π[(C^N) <sub>2</sub> ]→π*[(C^N) <sub>1</sub> +(C^N) <sub>2</sub> ]/LLCT/IL |                                                                                                           |                                                                         |  |
| S <sub>31</sub>            | 310/4.00        | 0.0688         | H-3→L+6(74%) | π[(C^N) <sub>2</sub> ]→π*[(C^N) <sub>1</sub> +(C^N) <sub>3</sub> ]/LLCT    |                                                                                                           |                                                                         |  |
| <b>1b</b>                  | S <sub>1</sub>  | 422/2.94       | 0.0043       | H→L(92%)                                                                   | d(Ir)+π[(C^N)]→π*[(C^N)]/MLCT/LLCT/IL                                                                     |                                                                         |  |
|                            | S <sub>4</sub>  | 396/3.13       | 0.1534       | H-1→L(80%)                                                                 | d(Ir)+π[(C^N) <sub>2</sub> +(C^N) <sub>3</sub> ]→π*[(C^N)]/MLCT/LLCT/IL                                   |                                                                         |  |

|           |                 |          |        |                              |                                                                                                                                                                                                                                                                                                                                                                                                  |
|-----------|-----------------|----------|--------|------------------------------|--------------------------------------------------------------------------------------------------------------------------------------------------------------------------------------------------------------------------------------------------------------------------------------------------------------------------------------------------------------------------------------------------|
|           | S <sub>5</sub>  | 396/3.13 | 0.1567 | H-2→L(80%)                   | $d(\text{Ir})+\pi[(\text{C}^{\wedge}\text{N})_1+(\text{C}^{\wedge}\text{N})_2]\rightarrow\pi^*[(\text{C}^{\wedge}\text{N})]/\text{MLCT}/\text{LLCT}/\text{IL}$                                                                                                                                                                                                                                   |
|           | S <sub>7</sub>  | 389/3.19 | 0.1047 | H-1→L+1(34%)<br>H-2→L+2(31%) | $d(\text{Ir})+\pi[(\text{C}^{\wedge}\text{N})_2+(\text{C}^{\wedge}\text{N})_3]\rightarrow\pi^*[(\text{C}^{\wedge}\text{N})_2+(\text{C}^{\wedge}\text{N})_3]/\text{MLCT}/\text{LLCT}/\text{IL}$<br>$d(\text{Ir})+\pi[(\text{C}^{\wedge}\text{N})_1+(\text{C}^{\wedge}\text{N})_2]\rightarrow\pi^*[(\text{C}^{\wedge}\text{N})_1+(\text{C}^{\wedge}\text{N})_3]/\text{MLCT}/\text{LLCT}/\text{IL}$ |
|           | S <sub>8</sub>  | 389/3.19 | 0.1144 | H-1→L+2(33%)<br>H-2→L+1(32%) | $d(\text{Ir})+\pi[(\text{C}^{\wedge}\text{N})_2+(\text{C}^{\wedge}\text{N})_3]\rightarrow\pi^*[(\text{C}^{\wedge}\text{N})_1+(\text{C}^{\wedge}\text{N})_3]/\text{MLCT}/\text{LLCT}/\text{IL}$<br>$d(\text{Ir})+\pi[(\text{C}^{\wedge}\text{N})_1+(\text{C}^{\wedge}\text{N})_2]\rightarrow\pi^*[(\text{C}^{\wedge}\text{N})_2+(\text{C}^{\wedge}\text{N})_3]/\text{MLCT}/\text{LLCT}/\text{IL}$ |
|           | S <sub>13</sub> | 352/3.52 | 0.1278 | H→L+3(79%)                   | $d(\text{Ir})+\pi[(\text{C}^{\wedge}\text{N})]\rightarrow\pi^*[(\text{C}^{\wedge}\text{N})]/\text{MLCT}/\text{LLCT}/\text{IL}$                                                                                                                                                                                                                                                                   |
|           | S <sub>19</sub> | 335/3.70 | 0.0801 | H→L+4(84%)                   | $d(\text{Ir})+\pi[(\text{C}^{\wedge}\text{N})]\rightarrow\pi^*[(\text{C}^{\wedge}\text{N})]/\text{MLCT}/\text{LLCT}/\text{IL}$                                                                                                                                                                                                                                                                   |
|           | S <sub>21</sub> | 334/3.71 | 0.0790 | H→L+5(83%)                   | $d(\text{Ir})+\pi[(\text{C}^{\wedge}\text{N})]\rightarrow\pi^*[(\text{C}^{\wedge}\text{N})_1+(\text{C}^{\wedge}\text{N})_2]/\text{MLCT}/\text{LLCT}/\text{IL}$                                                                                                                                                                                                                                   |
|           | S <sub>28</sub> | 311/3.99 | 0.1053 | H-3→L+3(48%)                 | $\pi[(\text{C}^{\wedge}\text{N})_1]\rightarrow\pi^*[(\text{C}^{\wedge}\text{N})]/\text{LLCT}/\text{IL}$                                                                                                                                                                                                                                                                                          |
|           | S <sub>29</sub> | 311/3.99 | 0.1169 | H-4→L+3(31%)                 | $\pi[(\text{C}^{\wedge}\text{N})_3]\rightarrow\pi^*[(\text{C}^{\wedge}\text{N})]/\text{LLCT}/\text{IL}$                                                                                                                                                                                                                                                                                          |
|           | S <sub>30</sub> | 310/4.00 | 0.1114 | H-5→L+3(41%)                 | $\pi[(\text{C}^{\wedge}\text{N})_2]\rightarrow\pi^*[(\text{C}^{\wedge}\text{N})]/\text{LLCT}/\text{IL}$                                                                                                                                                                                                                                                                                          |
|           | S <sub>31</sub> | 304/4.08 | 0.2649 | H-5→L+6(46%)<br>H-4→L+6(21%) | $\pi[(\text{C}^{\wedge}\text{N})_2]\rightarrow\pi^*[(\text{C}^{\wedge}\text{N})_2]/\text{IL}$<br>$\pi[(\text{C}^{\wedge}\text{N})_3]\rightarrow\pi^*[(\text{C}^{\wedge}\text{N})_2]/\text{LLCT}$                                                                                                                                                                                                 |
|           | S <sub>32</sub> | 303/4.09 | 0.3401 | H-3→L+7(37%)                 | $\pi[(\text{C}^{\wedge}\text{N})_1]\rightarrow\pi^*[(\text{C}^{\wedge}\text{N})_1+(\text{C}^{\wedge}\text{N})_3]/\text{LLCT}/\text{IL}$                                                                                                                                                                                                                                                          |
|           | S <sub>33</sub> | 303/4.09 | 0.3263 | H-4→L+8(27%)                 | $\pi[(\text{C}^{\wedge}\text{N})_3]\rightarrow\pi^*[(\text{C}^{\wedge}\text{N})_1+(\text{C}^{\wedge}\text{N})_3]/\text{LLCT}/\text{IL}$                                                                                                                                                                                                                                                          |
| <b>1c</b> | S <sub>1</sub>  | 423/2.93 | 0.0027 | H→L(87%)                     | $d(\text{Ir})+\pi[(\text{C}^{\wedge}\text{N})]\rightarrow\pi^*[(\text{C}^{\wedge}\text{N})]/\text{MLCT}/\text{LLCT}/\text{IL}$                                                                                                                                                                                                                                                                   |
|           | S <sub>4</sub>  | 404/3.07 | 0.6873 | H-2→L(47%)<br>H-1→L(27%)     | $d(\text{Ir})+\pi[(\text{C}^{\wedge}\text{N})_2+(\text{C}^{\wedge}\text{N})_3]\rightarrow\pi^*[(\text{C}^{\wedge}\text{N})]/\text{MLCT}/\text{LLCT}/\text{IL}$<br>$d(\text{Ir})+\pi[(\text{C}^{\wedge}\text{N})]\rightarrow\pi^*[(\text{C}^{\wedge}\text{N})]/\text{MLCT}/\text{LLCT}/\text{IL}$                                                                                                 |
|           | S <sub>5</sub>  | 403/3.07 | 0.6571 | H-1→L(43%)<br>H-2→L(25%)     | $d(\text{Ir})+\pi[(\text{C}^{\wedge}\text{N})]\rightarrow\pi^*[(\text{C}^{\wedge}\text{N})]/\text{MLCT}/\text{LLCT}/\text{IL}$<br>$d(\text{Ir})+\pi[(\text{C}^{\wedge}\text{N})_2+(\text{C}^{\wedge}\text{N})_3]\rightarrow\pi^*[(\text{C}^{\wedge}\text{N})]/\text{MLCT}/\text{LLCT}/\text{IL}$                                                                                                 |
|           | S <sub>7</sub>  | 394/3.15 | 0.1112 | H-1→L+2(35%)<br>H-2→L+1(33%) | $d(\text{Ir})+\pi[(\text{C}^{\wedge}\text{N})]\rightarrow\pi^*[(\text{C}^{\wedge}\text{N})_1+(\text{C}^{\wedge}\text{N})_2]/\text{MLCT}/\text{LLCT}/\text{IL}$<br>$d(\text{Ir})+\pi[(\text{C}^{\wedge}\text{N})_2+(\text{C}^{\wedge}\text{N})_3]\rightarrow\pi^*[(\text{C}^{\wedge}\text{N})_2+(\text{C}^{\wedge}\text{N})_3]/\text{MLCT}/\text{LLCT}/\text{IL}$                                 |
|           | S <sub>8</sub>  | 393/3.15 | 0.0751 | H-2→L+2(47%)<br>H-1→L+1(22%) | $d(\text{Ir})+\pi[(\text{C}^{\wedge}\text{N})_2+(\text{C}^{\wedge}\text{N})_3]\rightarrow\pi^*[(\text{C}^{\wedge}\text{N})_1+(\text{C}^{\wedge}\text{N})_2]/\text{MLCT}/\text{LLCT}/\text{IL}$<br>$d(\text{Ir})+\pi[(\text{C}^{\wedge}\text{N})]\rightarrow\pi^*[(\text{C}^{\wedge}\text{N})_2+(\text{C}^{\wedge}\text{N})_3]/\text{MLCT}/\text{LLCT}/\text{IL}$                                 |
|           | S <sub>9</sub>  | 380/3.26 | 0.2702 | H-1→L+2(28%)<br>H-2→L+1(26%) | $d(\text{Ir})+\pi[(\text{C}^{\wedge}\text{N})]\rightarrow\pi^*[(\text{C}^{\wedge}\text{N})_1+(\text{C}^{\wedge}\text{N})_2]/\text{MLCT}/\text{LLCT}/\text{IL}$<br>$d(\text{Ir})+\pi[(\text{C}^{\wedge}\text{N})_2+(\text{C}^{\wedge}\text{N})_3]\rightarrow\pi^*[(\text{C}^{\wedge}\text{N})_2+(\text{C}^{\wedge}\text{N})_3]/\text{MLCT}/\text{LLCT}/\text{IL}$                                 |
|           | S <sub>10</sub> | 363/3.42 | 0.4968 | H-5→L(30%)                   | $\pi[(\text{C}^{\wedge}\text{N})_2+(\text{C}^{\wedge}\text{N})_3]\rightarrow\pi^*[(\text{C}^{\wedge}\text{N})]/\text{LLCT}/\text{IL}$                                                                                                                                                                                                                                                            |
|           | S <sub>11</sub> | 362/3.42 | 0.4867 | H-4→L(27%)<br>H-3→L+2(26%)   | $\pi[(\text{C}^{\wedge}\text{N})]\rightarrow\pi^*[(\text{C}^{\wedge}\text{N})]/\text{LLCT}/\text{IL}$<br>$\pi[(\text{C}^{\wedge}\text{N})]\rightarrow\pi^*[(\text{C}^{\wedge}\text{N})_1+(\text{C}^{\wedge}\text{N})_2]/\text{LLCT}/\text{IL}$                                                                                                                                                   |
|           | S <sub>12</sub> | 362/3.42 | 0.4700 | H-3→L(20%)<br>H→L+3(20%)     | $\pi[(\text{C}^{\wedge}\text{N})]\rightarrow\pi^*[(\text{C}^{\wedge}\text{N})]/\text{LLCT}/\text{IL}$<br>$d(\text{Ir})+\pi[(\text{C}^{\wedge}\text{N})]\rightarrow\pi^*[(\text{C}^{\wedge}\text{N})]/\text{MLCT}/\text{LLCT}/\text{IL}$                                                                                                                                                          |
|           | S <sub>16</sub> | 337/3.68 | 0.0394 | H→L+4(72%)                   | $d(\text{Ir})+\pi[(\text{C}^{\wedge}\text{N})]\rightarrow\pi^*[(\text{C}^{\wedge}\text{N})]/\text{MLCT}/\text{LLCT}/\text{IL}$                                                                                                                                                                                                                                                                   |
|           | S <sub>17</sub> | 336/3.69 | 0.0428 | H→L+5(66%)                   | $d(\text{Ir})+\pi[(\text{C}^{\wedge}\text{N})]\rightarrow\pi^*[(\text{C}^{\wedge}\text{N})_1+(\text{C}^{\wedge}\text{N})_2]/\text{MLCT}/\text{LLCT}/\text{IL}$                                                                                                                                                                                                                                   |
| <b>2a</b> | S <sub>1</sub>  | 422/2.94 | 0.0013 | H-1→L(40%)<br>H-4→L(22%)     | $d(\text{Ir})+\pi[(\text{C}^{\wedge}\text{N})_1]\rightarrow\pi^*[(\text{C}^{\wedge}\text{N})_1+(\text{C}^{\wedge}\text{N})_2]/\text{MLCT}/\text{LLCT}/\text{IL}$<br>$d(\text{Ir})+\pi[(\text{C}^{\wedge}\text{N})]\rightarrow\pi^*[(\text{C}^{\wedge}\text{N})_1+(\text{C}^{\wedge}\text{N})_2]/\text{MLCT}/\text{LLCT}/\text{IL}$                                                               |
|           | S <sub>2</sub>  | 412/3.01 | 0.0728 | H→L(45%)<br>H-1→L+1(28%)     | $\pi[(\text{C}^{\wedge}\text{N})_2]\rightarrow\pi^*[(\text{C}^{\wedge}\text{N})_1+(\text{C}^{\wedge}\text{N})_2]/\text{LLCT}/\text{IL}$<br>$d(\text{Ir})+\pi[(\text{C}^{\wedge}\text{N})_1]\rightarrow\pi^*[(\text{C}^{\wedge}\text{N})_1+(\text{C}^{\wedge}\text{N})_2]/\text{MLCT}/\text{LLCT}/\text{IL}$                                                                                      |
|           | S <sub>4</sub>  | 406/3.06 | 0.0840 | H-2→L+1(31%)<br>H→L(22%)     | $d(\text{Ir})+\pi[(\text{C}^{\wedge}\text{N})_2+(\text{C}^{\wedge}\text{N})_3]\rightarrow\pi^*[(\text{C}^{\wedge}\text{N})_1+(\text{C}^{\wedge}\text{N})_2]/\text{MLCT}/\text{LLCT}/\text{IL}$<br>$\pi[(\text{C}^{\wedge}\text{N})_2]\rightarrow\pi^*[(\text{C}^{\wedge}\text{N})_1+(\text{C}^{\wedge}\text{N})_2]/\text{LLCT}/\text{IL}$                                                        |
|           | S <sub>8</sub>  | 388/3.19 | 0.1169 | H-7→L(20%)<br>H-1→L+1(16%)   | $d(\text{Ir})+\pi[(\text{C}^{\wedge}\text{N})_2+(\text{C}^{\wedge}\text{N})_3]\rightarrow\pi^*[(\text{C}^{\wedge}\text{N})_1+(\text{C}^{\wedge}\text{N})_2]/\text{MLCT}/\text{LLCT}/\text{IL}$<br>$d(\text{Ir})+\pi[(\text{C}^{\wedge}\text{N})_1]\rightarrow\pi^*[(\text{C}^{\wedge}\text{N})_1+(\text{C}^{\wedge}\text{N})_2]/\text{MLCT}/\text{LLCT}/\text{IL}$                               |

|                 |                 |          |               |                                                                                            |                                                                                                   |     |
|-----------------|-----------------|----------|---------------|--------------------------------------------------------------------------------------------|---------------------------------------------------------------------------------------------------|-----|
|                 | S <sub>12</sub> | 376/3.30 | 0.0845        | H-5→L+2(31%)                                                                               | $\pi[(C^{\wedge}N)_3] \rightarrow \pi^*[(C^{\wedge}N)_3]/IL$                                      |     |
|                 | S <sub>13</sub> | 375/3.31 | 0.0542        | H-8→L(53%)                                                                                 | $\pi[(C^{\wedge}N)_1] \rightarrow \pi^*[(C^{\wedge}N)_1+(C^{\wedge}N)_2]/LLCT/IL$                 |     |
|                 | S <sub>26</sub> | 344/3.60 | 0.0602        | H-1→L+3(38%)                                                                               | $d(Ir)+\pi[(C^{\wedge}N)_1] \rightarrow \pi^*[(C^{\wedge}N)]/MLCT/LLCT/IL$                        |     |
|                 | S <sub>27</sub> | 341/3.63 | 0.0503        | H-2→L+3(42%)                                                                               | $d(Ir)+\pi[(C^{\wedge}N)_2+(C^{\wedge}N)_3] \rightarrow \pi^*[(C^{\wedge}N)]/MLCT/LLCT/IL$        |     |
|                 | S <sub>43</sub> | 308/4.03 | 0.0771        | H-3→L+8(64%)                                                                               | $\pi[(C^{\wedge}N)_2+(C^{\wedge}N)_3] \rightarrow \pi^*[(C^{\wedge}N)_2]/LLCT/IL$                 |     |
| <b>2b</b>       | S <sub>1</sub>  | 470/2.64 | 0.0108        | H→L(67%)                                                                                   | $\pi[(C^{\wedge}N)] \rightarrow \pi^*[(C^{\wedge}N)]/LLCT/IL$                                     |     |
|                 | S <sub>4</sub>  | 449/2.76 | 0.0833        | H→L+1(31%)                                                                                 | $\pi[(C^{\wedge}N)] \rightarrow \pi^*[(C^{\wedge}N)]/LLCT/IL$                                     | 424 |
|                 |                 |          |               | H-2→L(27%)                                                                                 | $\pi[(C^{\wedge}N)] \rightarrow \pi^*[(C^{\wedge}N)]/LLCT/IL$                                     |     |
|                 | S <sub>5</sub>  | 448/2.77 | 0.0712        | H-1→L(36%)                                                                                 | $\pi[(C^{\wedge}N)] \rightarrow \pi^*[(C^{\wedge}N)]/LLCT/IL$                                     |     |
|                 | S <sub>10</sub> | 396/3.13 | 0.0569        | H→L+3(84%)                                                                                 | $\pi[(C^{\wedge}N)] \rightarrow \pi^*[(C^{\wedge}N)]/LLCT/IL$                                     |     |
|                 | S <sub>28</sub> | 344/3.61 | 0.1956        | H-7→L(61%)                                                                                 | $\pi[(C^{\wedge}N)] \rightarrow \pi^*[(C^{\wedge}N)]/LLCT/IL$                                     |     |
|                 | S <sub>31</sub> | 341/3.64 | 0.1203        | H-3→L+2(26%)                                                                               | $\pi[(C^{\wedge}N)] \rightarrow \pi^*[(C^{\wedge}N)_2+(C^{\wedge}N)_3]/LLCT/IL$                   |     |
|                 | S <sub>32</sub> | 340/3.64 | 0.0723        | H-3→L+2(35%)                                                                               | $\pi[(C^{\wedge}N)] \rightarrow \pi^*[(C^{\wedge}N)_2+(C^{\wedge}N)_3]/LLCT/IL$                   |     |
|                 |                 |          |               | H-8→L(25%)                                                                                 | $\pi[(C^{\wedge}N)] \rightarrow \pi^*[(C^{\wedge}N)]/LLCT/IL$                                     |     |
|                 | S <sub>36</sub> | 329/3.77 | 0.1543        | H-8→L+2(52%)                                                                               | $\pi[(C^{\wedge}N)] \rightarrow \pi^*[(C^{\wedge}N)_2+(C^{\wedge}N)_3]/LLCT/IL$                   |     |
|                 |                 |          |               | H-7→L+1(22%)                                                                               | $\pi[(C^{\wedge}N)] \rightarrow \pi^*[(C^{\wedge}N)]/LLCT/IL$                                     |     |
|                 | S <sub>41</sub> | 311/3.98 | 0.0733        | H→L+17(19%)                                                                                | $\pi[(C^{\wedge}N)] \rightarrow \pi^*[(C^{\wedge}N)_2+(C^{\wedge}N)_3]/LLCT/IL$                   |     |
|                 | S <sub>42</sub> | 311/3.98 | 0.0833        | H→L+16(28%)                                                                                | $\pi[(C^{\wedge}N)] \rightarrow \pi^*[(C^{\wedge}N)_2]/LLCT/IL$                                   |     |
|                 |                 |          |               | H-1→L+16(18%)                                                                              | $\pi[(C^{\wedge}N)] \rightarrow \pi^*[(C^{\wedge}N)_2]/LLCT/IL$                                   |     |
| S <sub>43</sub> | 310/3.99        | 0.1185   | H→L+7(16%)    | $\pi[(C^{\wedge}N)] \rightarrow \pi^*[(C^{\wedge}N)]/LLCT/IL$                              |                                                                                                   |     |
|                 |                 |          | H-2→L+15(15%) | $\pi[(C^{\wedge}N)] \rightarrow \pi^*[(C^{\wedge}N)_1]/LLCT/IL$                            |                                                                                                   |     |
| S <sub>48</sub> | 307/4.03        | 0.1942   | H-7→L+3(34%)  | $\pi[(C^{\wedge}N)] \rightarrow \pi^*[(C^{\wedge}N)]/LLCT/IL$                              | 307                                                                                               |     |
| S <sub>49</sub> | 307/4.04        | 0.1095   | H-1→L+7(36%)  | $\pi[(C^{\wedge}N)] \rightarrow \pi^*[(C^{\wedge}N)]/LLCT/IL$                              |                                                                                                   |     |
| S <sub>50</sub> | 307/4.04        | 0.0822   | H-1→L+7(15%)  | $\pi[(C^{\wedge}N)] \rightarrow \pi^*[(C^{\wedge}N)]/LLCT/IL$                              |                                                                                                   |     |
| <b>2c</b>       | S <sub>1</sub>  | 439/2.83 | 0.0748        | H→L(39%)                                                                                   | $\pi[(C^{\wedge}N)] \rightarrow \pi^*[(C^{\wedge}N)_2]/LLCT/IL$                                   |     |
|                 |                 |          |               | H-1→L(30%)                                                                                 | $\pi[(C^{\wedge}N)] \rightarrow \pi^*[(C^{\wedge}N)_2]/LLCT/IL$                                   |     |
|                 | S <sub>2</sub>  | 431/2.88 | 0.1749        | H→L+1(54%)                                                                                 | $\pi[(C^{\wedge}N)] \rightarrow \pi^*[(C^{\wedge}N)]/LLCT/IL$                                     |     |
|                 | S <sub>3</sub>  | 431/2.88 | 0.1526        | H→L+2(35%)                                                                                 | $\pi[(C^{\wedge}N)] \rightarrow \pi^*[(C^{\wedge}N)_1+(C^{\wedge}N)_3]/LLCT/IL$                   |     |
|                 |                 |          |               | H-1→L+2(28%)                                                                               | $\pi[(C^{\wedge}N)] \rightarrow \pi^*[(C^{\wedge}N)_1+(C^{\wedge}N)_3]/LLCT/IL$                   |     |
|                 | S <sub>4</sub>  | 423/2.93 | 0.2992        | H-2→L(71%)                                                                                 | $\pi[(C^{\wedge}N)_1+(C^{\wedge}N)_2] \rightarrow \pi^*[(C^{\wedge}N)_2]/LLCT/IL$                 |     |
|                 | S <sub>5</sub>  | 417/2.97 | 0.1100        | H-1→L(43%)                                                                                 | $\pi[(C^{\wedge}N)] \rightarrow \pi^*[(C^{\wedge}N)_2]/LLCT/IL$                                   |     |
|                 | S <sub>6</sub>  | 412/3.01 | 0.0949        | H-1→L+2(35%)                                                                               | $\pi[(C^{\wedge}N)] \rightarrow \pi^*[(C^{\wedge}N)_1+(C^{\wedge}N)_3]/LLCT/IL$                   |     |
|                 | S <sub>7</sub>  | 412/3.01 | 0.1591        | H-1→L+1(40%)                                                                               | $\pi[(C^{\wedge}N)] \rightarrow \pi^*[(C^{\wedge}N)]/LLCT/IL$                                     |     |
|                 |                 |          |               | H-2→L+1(20%)                                                                               | $\pi[(C^{\wedge}N)_1+(C^{\wedge}N)_2] \rightarrow \pi^*[(C^{\wedge}N)]/LLCT/IL$                   |     |
|                 | S <sub>9</sub>  | 397/3.12 | 0.0982        | H-2→L+2(53%)                                                                               | $\pi[(C^{\wedge}N)_1+(C^{\wedge}N)_2] \rightarrow \pi^*[(C^{\wedge}N)_1+(C^{\wedge}N)_3]/LLCT/IL$ |     |
|                 | S <sub>10</sub> | 394/3.14 | 0.3908        | H-3→L(38%)                                                                                 | $d(Ir)+\pi[(C^{\wedge}N)] \rightarrow \pi^*[(C^{\wedge}N)_2]/MLCT/LLCT/IL$                        |     |
|                 | S <sub>11</sub> | 388/3.20 | 0.2346        | H-4→L(40%)                                                                                 | $d(Ir)+\pi[(C^{\wedge}N)] \rightarrow \pi^*[(C^{\wedge}N)_2]/MLCT/LLCT/IL$                        |     |
|                 | S <sub>12</sub> | 386/3.21 | 0.3865        | H-3→L+2(46%)                                                                               | $d(Ir)+\pi[(C^{\wedge}N)] \rightarrow \pi^*[(C^{\wedge}N)_1+(C^{\wedge}N)_3]/MLCT/LLCT/IL$        | 376 |
| S <sub>13</sub> | 383/3.23        | 0.1700   | H-5→L(22%)    | $d(Ir)+\pi[(C^{\wedge}N)] \rightarrow \pi^*[(C^{\wedge}N)_2]/MLCT/LLCT/IL$                 |                                                                                                   |     |
| S <sub>14</sub> | 381/3.25        | 0.3516   | H-4→L+1(16%)  | $d(Ir)+\pi[(C^{\wedge}N)] \rightarrow \pi^*[(C^{\wedge}N)]/MLCT/LLCT/IL$                   |                                                                                                   |     |
|                 |                 |          | H-4→L+2(16%)  | $d(Ir)+\pi[(C^{\wedge}N)] \rightarrow \pi^*[(C^{\wedge}N)_1+(C^{\wedge}N)_3]/MLCT/LLCT/IL$ |                                                                                                   |     |

|                 |          |        |               |                                                                                                                                                                |
|-----------------|----------|--------|---------------|----------------------------------------------------------------------------------------------------------------------------------------------------------------|
|                 |          |        | H-3→L+1(15%)  | $d(\text{Ir})+\pi[(\text{C}^{\wedge}\text{N})]\rightarrow\pi^*[(\text{C}^{\wedge}\text{N})]/\text{MLCT}/\text{LLCT}/\text{IL}$                                 |
| S <sub>15</sub> | 378/3.28 | 0.1890 | H-3→L+1(23%)  | $d(\text{Ir})+\pi[(\text{C}^{\wedge}\text{N})]\rightarrow\pi^*[(\text{C}^{\wedge}\text{N})]/\text{MLCT}/\text{LLCT}/\text{IL}$                                 |
| S <sub>16</sub> | 377/3.29 | 0.3301 | H→L+3(49%)    | $\pi[(\text{C}^{\wedge}\text{N})]\rightarrow\pi^*[(\text{C}^{\wedge}\text{N})]/\text{LLCT}/\text{IL}$                                                          |
| S <sub>17</sub> | 375/3.31 | 0.0816 | H-5→L+1(32%)  | $d(\text{Ir})+\pi[(\text{C}^{\wedge}\text{N})]\rightarrow\pi^*[(\text{C}^{\wedge}\text{N})]/\text{MLCT}/\text{LLCT}/\text{IL}$                                 |
| S <sub>18</sub> | 371/3.34 | 0.1839 | H-1→L+3(38%)  | $\pi[(\text{C}^{\wedge}\text{N})]\rightarrow\pi^*[(\text{C}^{\wedge}\text{N})]/\text{LLCT}/\text{IL}$                                                          |
|                 |          |        | H→L+3(20%)    | $\pi[(\text{C}^{\wedge}\text{N})]\rightarrow\pi^*[(\text{C}^{\wedge}\text{N})]/\text{LLCT}/\text{IL}$                                                          |
| S <sub>19</sub> | 370/3.35 | 0.1504 | H-4→L+2(17%)  | $d(\text{Ir})+\pi[(\text{C}^{\wedge}\text{N})]\rightarrow\pi^*[(\text{C}^{\wedge}\text{N})_1+(\text{C}^{\wedge}\text{N})_3]/\text{MLCT}/\text{LLCT}/\text{IL}$ |
| S <sub>20</sub> | 369/3.36 | 0.1922 | H-2→L+3(43%)  | $\pi[(\text{C}^{\wedge}\text{N})_1+(\text{C}^{\wedge}\text{N})_2]\rightarrow\pi^*[(\text{C}^{\wedge}\text{N})]/\text{LLCT}/\text{IL}$                          |
| S <sub>21</sub> | 365/3.40 | 0.2480 | H-5→L+2(48%)  | $d(\text{Ir})+\pi[(\text{C}^{\wedge}\text{N})]\rightarrow\pi^*[(\text{C}^{\wedge}\text{N})_1+(\text{C}^{\wedge}\text{N})_3]/\text{MLCT}/\text{LLCT}/\text{IL}$ |
| S <sub>22</sub> | 358/3.46 | 0.2909 | H-8→L(19%)    | $\pi[(\text{C}^{\wedge}\text{N})_2+(\text{C}^{\wedge}\text{N})_3]\rightarrow\pi^*[(\text{C}^{\wedge}\text{N})_2]/\text{LLCT}/\text{IL}$                        |
|                 |          |        | H-2→L+3(19%)  | $\pi[(\text{C}^{\wedge}\text{N})_1+(\text{C}^{\wedge}\text{N})_2]\rightarrow\pi^*[(\text{C}^{\wedge}\text{N})]/\text{LLCT}/\text{IL}$                          |
| S <sub>23</sub> | 357/3.48 | 0.2670 | H-1→L+3(15%)  | $\pi[(\text{C}^{\wedge}\text{N})]\rightarrow\pi^*[(\text{C}^{\wedge}\text{N})]/\text{LLCT}/\text{IL}$                                                          |
|                 |          |        | H→L+5(14%)    | $\pi[(\text{C}^{\wedge}\text{N})]\rightarrow\pi^*[(\text{C}^{\wedge}\text{N})_1+(\text{C}^{\wedge}\text{N})_3]/\text{LLCT}/\text{IL}$                          |
| S <sub>24</sub> | 354/3.51 | 0.1067 | H-7→L+1(18%)  | $\pi[(\text{C}^{\wedge}\text{N})]\rightarrow\pi^*[(\text{C}^{\wedge}\text{N})]/\text{LLCT}/\text{IL}$                                                          |
| S <sub>45</sub> | 313/3.96 | 0.1875 | H-1→L+12(55%) | $\pi[(\text{C}^{\wedge}\text{N})]\rightarrow\pi^*[(\text{C}^{\wedge}\text{N})]/\text{LLCT}/\text{IL}$                                                          |
| S <sub>48</sub> | 311/3.99 | 0.0517 | H-5→L+7(16%)  | $d(\text{Ir})+\pi[(\text{C}^{\wedge}\text{N})]\rightarrow\pi^*[(\text{C}^{\wedge}\text{N})_1+(\text{C}^{\wedge}\text{N})_3]/\text{MLCT}/\text{LLCT}/\text{IL}$ |
| S <sub>49</sub> | 310/3.99 | 0.1113 | H→L+13(16%)   | $\pi[(\text{C}^{\wedge}\text{N})]\rightarrow\pi^*[(\text{C}^{\wedge}\text{N})]/\text{LLCT}/\text{IL}$                                                          |

304

<sup>a</sup> H = HOMO; L = LUMO; <sup>b</sup> Experimental data from refs. 27-28

**Table S9.** The Cartesian coordinates for the optimized structures for **2a** in the ground states (S<sub>0</sub>)

|   |             |             |             |
|---|-------------|-------------|-------------|
| C | -2.77897600 | -2.34478400 | -3.61148200 |
| C | -2.16268600 | -1.23930900 | -3.03843200 |
| C | -1.19340600 | -1.36895900 | -2.03207700 |
| C | -0.86955100 | -2.68812700 | -1.59289600 |
| C | -1.45303700 | -3.80856200 | -2.22918300 |
| C | -2.41225200 | -3.62877800 | -3.22116800 |
| H | -3.53108800 | -2.21156700 | -4.38594900 |
| H | -2.43351700 | -0.24492400 | -3.38096600 |
| H | -2.85046400 | -4.50691700 | -3.68682400 |
| C | 0.05062400  | -2.75311000 | -0.44742300 |
| C | 0.40728700  | -3.89425500 | 0.27992100  |
| C | 1.24083600  | -3.82400600 | 1.39763700  |
| H | 0.03198000  | -4.85353500 | -0.04002300 |
| C | 1.33185200  | -1.46625400 | 1.01789800  |
| C | 1.71209500  | -2.56123200 | 1.77189500  |
| H | 1.67203200  | -0.46935800 | 1.27837600  |
| H | 2.33904900  | -2.41431900 | 2.64172600  |
| N | 0.52627400  | -1.54523500 | -0.04742600 |

|    |             |             |             |
|----|-------------|-------------|-------------|
| C  | -1.20564700 | 3.40645600  | -3.81675500 |
| C  | -0.55600600 | 2.32275300  | -3.24253400 |
| C  | -1.07903900 | 1.64675200  | -2.12829600 |
| C  | -2.32746300 | 2.10129900  | -1.60474800 |
| C  | -3.00230600 | 3.18023700  | -2.22419500 |
| C  | -2.42955200 | 3.83450700  | -3.30933800 |
| H  | -0.76769300 | 3.91706700  | -4.67180800 |
| H  | 0.39070800  | 1.99176700  | -3.65865100 |
| H  | -2.96639200 | 4.66770400  | -3.75451900 |
| C  | -2.77371700 | 1.41018200  | -0.38503900 |
| C  | -3.96012500 | 1.63145600  | 0.32462600  |
| C  | -4.25230800 | 0.92967500  | 1.49348500  |
| H  | -4.67552500 | 2.34604100  | -0.05179100 |
| C  | -2.15887700 | -0.18188400 | 1.20888000  |
| C  | -3.30918800 | 0.00656800  | 1.95227400  |
| H  | -1.40535300 | -0.89810800 | 1.51925700  |
| H  | -3.45456900 | -0.55302100 | 2.86800400  |
| C  | 1.77689800  | 3.01154500  | 1.52594600  |
| C  | 0.85374800  | 2.22751100  | 0.86122200  |
| C  | 2.40547000  | 1.54260900  | -0.74563000 |
| C  | 3.37955300  | 2.31557000  | -0.10536700 |
| C  | 3.08749000  | 3.05682500  | 1.03812500  |
| H  | 1.48064600  | 3.56957800  | 2.40725600  |
| H  | -0.17261300 | 2.15274200  | 1.20632000  |
| H  | 4.37605500  | 2.34841800  | -0.51708700 |
| C  | 2.58281900  | 0.71787200  | -1.95201500 |
| C  | 3.77935700  | 0.59727400  | -2.69730600 |
| C  | 3.82706200  | -0.22764600 | -3.81694300 |
| C  | 1.51361200  | -0.80858800 | -3.50115400 |
| C  | 2.69242900  | -0.91994100 | -4.22585600 |
| H  | 4.76551500  | -0.31177800 | -4.35783200 |
| H  | 0.63542400  | -1.35616900 | -3.82922700 |
| H  | 2.73392600  | -1.54899900 | -5.11258300 |
| N  | -1.89215000 | 0.48583000  | 0.08099900  |
| Ir | -0.18698000 | 0.13459000  | -1.15080400 |
| N  | 1.14966300  | 1.50441900  | -0.22582500 |
| C  | 1.42379800  | -0.01507200 | -2.34729300 |
| C  | 4.16206000  | 3.82066400  | 1.71001000  |
| C  | 5.40614200  | 3.20039300  | 1.89213900  |
| C  | 3.99332700  | 5.13999900  | 2.18255100  |
| C  | 6.45092900  | 3.83539500  | 2.55089600  |

|   |             |             |            |
|---|-------------|-------------|------------|
| H | 5.53385600  | 2.18111100  | 1.53590900 |
| C | 5.05458600  | 5.77368400  | 2.84094000 |
| C | 6.26768600  | 5.12837400  | 3.03578500 |
| H | 7.39695000  | 3.32059000  | 2.69145700 |
| H | 4.91174100  | 6.79218500  | 3.18978200 |
| H | 7.07462800  | 5.64348400  | 3.54982100 |
| C | -5.52377900 | 1.22060700  | 2.20052000 |
| C | -6.48458200 | 0.23335700  | 2.49597600 |
| C | -5.82075300 | 2.55389900  | 2.51550700 |
| C | -7.70002100 | 0.60265300  | 3.07881200 |
| C | -7.02559100 | 2.90935300  | 3.11014100 |
| H | -5.08659800 | 3.32048700  | 2.28002900 |
| C | -7.97347600 | 1.92877600  | 3.39057300 |
| H | -8.43398900 | -0.17518800 | 3.27121100 |
| H | -7.22432100 | 3.95092500  | 3.34641900 |
| H | -8.92264500 | 2.19417700  | 3.84783200 |
| C | 1.57337700  | -5.07821800 | 2.11455400 |
| C | 2.87419800  | -5.40664100 | 2.54759900 |
| C | 0.56038900  | -6.03350700 | 2.29600600 |
| C | 3.12816200  | -6.66741900 | 3.09437900 |
| C | 0.81696000  | -7.27402600 | 2.86463600 |
| H | -0.45116500 | -5.78871900 | 1.98257700 |
| C | 2.11257000  | -7.60076100 | 3.25670700 |
| H | 4.14747400  | -6.89977200 | 3.39073500 |
| H | 0.00618600  | -7.98548300 | 2.99368100 |
| H | 2.33032300  | -8.57252500 | 3.69094000 |
| N | 2.78497100  | 5.85464200  | 1.98842800 |
| N | -6.28145200 | -1.13739200 | 2.15282200 |
| N | 3.97043700  | -4.49800700 | 2.41623100 |
| C | 4.25555600  | -3.61488200 | 3.47269200 |
| C | 5.07802300  | -2.49476800 | 3.25722100 |
| C | 3.67418200  | -3.78056600 | 4.73817100 |
| C | 5.32599800  | -1.59400700 | 4.28376500 |
| H | 5.50986600  | -2.32704900 | 2.27566700 |
| C | 3.92218500  | -2.86186600 | 5.75500100 |
| H | 3.02673200  | -4.63038700 | 4.92727200 |
| C | 4.75309100  | -1.76740000 | 5.54329800 |
| H | 5.96428600  | -0.73599900 | 4.08847500 |
| H | 3.45958400  | -3.01580600 | 6.72658000 |
| H | 4.94635800  | -1.05617500 | 6.34085400 |
| C | 4.94348000  | -4.81738900 | 1.43410300 |

|   |             |             |             |
|---|-------------|-------------|-------------|
| C | 4.53132700  | -5.09511000 | 0.12561300  |
| C | 6.30586600  | -4.89473000 | 1.75064300  |
| C | 5.46628200  | -5.43588500 | -0.84542500 |
| H | 3.47773600  | -5.03987200 | -0.13212300 |
| C | 7.23478200  | -5.22403300 | 0.76847700  |
| H | 6.63283200  | -4.69489600 | 2.76681200  |
| C | 6.82261700  | -5.49701200 | -0.53407000 |
| H | 5.12215700  | -5.63860400 | -1.85578000 |
| H | 8.28819800  | -5.28023500 | 1.03109700  |
| H | 7.55107000  | -5.75268200 | -1.29813100 |
| C | 2.26194500  | 6.02004400  | 0.68314500  |
| C | 3.10952200  | 6.04186500  | -0.42850500 |
| C | 0.87834900  | 6.12337200  | 0.48505500  |
| C | 2.58012700  | 6.14694000  | -1.71098900 |
| H | 4.18346100  | 5.95745600  | -0.29218500 |
| C | 0.35979900  | 6.25020500  | -0.79758300 |
| H | 0.21231700  | 6.09503900  | 1.34277400  |
| C | 1.20653300  | 6.25513100  | -1.90448800 |
| H | 3.25694800  | 6.13732700  | -2.56039500 |
| H | -0.71629300 | 6.31910900  | -0.93309400 |
| H | 0.79481200  | 6.32999400  | -2.90657700 |
| C | 2.23854900  | 6.56288500  | 3.08060000  |
| C | 2.21793400  | 5.97613200  | 4.35372900  |
| C | 1.71611000  | 7.85365200  | 2.92315100  |
| C | 1.68810200  | 6.66560500  | 5.43825100  |
| H | 2.62808000  | 4.97887200  | 4.48714800  |
| C | 1.17412500  | 8.52788000  | 4.01134200  |
| H | 1.73644200  | 8.32109200  | 1.94362700  |
| C | 1.15697100  | 7.94302400  | 5.27571600  |
| H | 1.68161500  | 6.19238000  | 6.41672100  |
| H | 0.77477700  | 9.52873700  | 3.86871800  |
| H | 0.73708600  | 8.47655000  | 6.12348900  |
| C | -5.55539200 | -1.97250900 | 3.01843300  |
| C | -4.92195900 | -3.12422700 | 2.52125100  |
| C | -5.39253600 | -1.64854600 | 4.37205400  |
| C | -4.15950600 | -3.92524200 | 3.35974700  |
| H | -5.02015900 | -3.36843300 | 1.46760100  |
| C | -4.61263600 | -2.45319700 | 5.19982300  |
| H | -5.87312200 | -0.76148800 | 4.77300500  |
| C | -3.99469300 | -3.59729200 | 4.70614200  |
| H | -3.67153500 | -4.80608900 | 2.94902400  |



|   |             |             |             |
|---|-------------|-------------|-------------|
| H | -4.49829500 | -2.18010700 | 6.24579400  |
| H | -3.38961800 | -4.22263500 | 5.35592900  |
| C | -7.10750400 | -1.67305100 | 1.13352100  |
| C | -7.76116600 | -2.90129900 | 1.29669600  |
| C | -7.29965700 | -0.95219100 | -0.05072900 |
| C | -8.57078500 | -3.40322200 | 0.28377200  |
| H | -7.63134100 | -3.46021500 | 2.21865700  |
| C | -8.12359700 | -1.45609400 | -1.05046400 |
| H | -6.79668600 | -0.00001400 | -0.19199700 |
| C | -8.75975900 | -2.68532000 | -0.89453200 |
| H | -9.06869600 | -4.35895700 | 0.42648000  |
| H | -8.24866300 | -0.88130100 | -1.96389800 |
| H | -9.39457100 | -3.08044600 | -1.68253400 |
| N | 4.99881000  | 1.27394500  | -2.34942600 |
| N | -4.29277500 | 3.64848700  | -1.79985300 |
| N | -1.07068200 | -5.15761700 | -1.93083400 |
| C | 6.05370800  | 0.45801900  | -1.88262400 |
| C | 7.39115200  | 0.68004700  | -2.24044600 |
| C | 5.75280000  | -0.64374600 | -1.06574700 |
| C | 8.39281800  | -0.16616200 | -1.77576700 |
| H | 7.64524000  | 1.50651500  | -2.89591700 |
| C | 6.75927900  | -1.49597300 | -0.62796800 |
| H | 4.71912500  | -0.84386300 | -0.79954100 |
| C | 8.08923200  | -1.25953200 | -0.96952000 |
| H | 9.42169400  | 0.02525900  | -2.07073200 |
| H | 6.49780300  | -2.36233600 | -0.02535900 |
| H | 8.87301700  | -1.92692100 | -0.62293600 |
| C | 5.21676600  | 2.57290400  | -2.85144000 |
| C | 6.10178600  | 3.44956000  | -2.20059200 |
| C | 4.51915800  | 3.04037200  | -3.97325500 |
| C | 6.30927000  | 4.73466200  | -2.68594400 |
| H | 6.62932900  | 3.11629900  | -1.31140800 |
| C | 4.72873600  | 4.33220500  | -4.44546900 |
| H | 3.81869200  | 2.38367300  | -4.47814900 |
| C | 5.63006600  | 5.18691600  | -3.81647200 |
| H | 7.00494200  | 5.39007700  | -2.16795100 |
| H | 4.18446400  | 4.66638400  | -5.32522500 |
| H | 5.79913900  | 6.19022900  | -4.19725400 |
| C | 0.15574500  | -5.63312800 | -2.43669600 |
| C | 0.83280400  | -6.68996100 | -1.80559500 |
| C | 0.75597600  | -5.02044300 | -3.54512600 |

|   |             |             |             |
|---|-------------|-------------|-------------|
| C | 2.05552300  | -7.13584000 | -2.29316500 |
| H | 0.39840000  | -7.16175900 | -0.92885500 |
| C | 1.98636200  | -5.46609500 | -4.01528100 |
| H | 0.25245100  | -4.19427200 | -4.03623500 |
| C | 2.64228700  | -6.53104100 | -3.40340600 |
| H | 2.55882200  | -7.95619300 | -1.78803600 |
| H | 2.43006500  | -4.97575400 | -4.87786200 |
| H | 3.59562000  | -6.88571000 | -3.78529100 |
| C | -2.05280500 | -6.01506000 | -1.39692100 |
| C | -2.16366200 | -7.35702200 | -1.78793700 |
| C | -2.96874800 | -5.50976000 | -0.46023100 |
| C | -3.15021400 | -8.16939500 | -1.24006200 |
| H | -1.47983600 | -7.75843100 | -2.52901800 |
| C | -3.96117200 | -6.32796000 | 0.06724400  |
| H | -2.90444700 | -4.46588300 | -0.16516200 |
| C | -4.05626100 | -7.66577900 | -0.31017500 |
| H | -3.21920600 | -9.20552500 | -1.56179700 |
| H | -4.66919800 | -5.91253100 | 0.78051900  |
| H | -4.83052200 | -8.30298100 | 0.10710100  |
| C | -5.44178800 | 3.01989700  | -2.31448500 |
| C | -6.67162500 | 3.10861700  | -1.63854800 |
| C | -5.37423700 | 2.23661200  | -3.47583800 |
| C | -7.79927700 | 2.46650100  | -2.13570700 |
| H | -6.74126600 | 3.68316700  | -0.71945700 |
| C | -6.50783100 | 1.59031700  | -3.95667800 |
| H | -4.43101400 | 2.14276300  | -4.00329200 |
| C | -7.73104300 | 1.70640800  | -3.30205700 |
| H | -8.73820100 | 2.55470700  | -1.59520100 |
| H | -6.42972200 | 0.99634100  | -4.86366100 |
| H | -8.61697700 | 1.21358400  | -3.69268500 |
| C | -4.34443000 | 4.88652200  | -1.12687000 |
| C | -5.32204500 | 5.85012700  | -1.41197900 |
| C | -3.37379400 | 5.18049700  | -0.15711600 |
| C | -5.33638500 | 7.06076400  | -0.72780700 |
| H | -6.06611900 | 5.64883800  | -2.17624300 |
| C | -3.39139000 | 6.39930700  | 0.51240800  |
| H | -2.60145700 | 4.44793100  | 0.05870300  |
| C | -4.37534400 | 7.34675000  | 0.23888100  |
| H | -6.10144900 | 7.79452600  | -0.96872500 |
| H | -2.63036400 | 6.60496200  | 1.26147700  |
| H | -4.38914700 | 8.29587000  | 0.76668600  |

**Table S10.** The Cartesian coordinates for the optimized structures for **2b** in the ground states ( $S_0$ )

|   |             |             |             |
|---|-------------|-------------|-------------|
| C | -3.21603900 | -0.49118000 | 3.64031700  |
| C | -1.96885000 | -0.62409200 | 3.04443900  |
| C | -1.59378600 | 0.12373200  | 1.91515600  |
| C | -2.55477700 | 1.05269200  | 1.43422900  |
| C | -3.80543300 | 1.20486800  | 2.04555900  |
| C | -4.15231100 | 0.42456300  | 3.14198900  |
| H | -1.26569100 | -1.34149500 | 3.45797600  |
| H | -4.53431200 | 1.91996200  | 1.67362700  |
| C | -2.14986300 | 1.85153300  | 0.27825400  |
| C | -2.91941500 | 2.84700000  | -0.33075800 |
| C | -2.43529100 | 3.56428200  | -1.42303300 |
| H | -3.89717200 | 3.08518000  | 0.07293700  |
| C | -0.42883000 | 2.25974800  | -1.23533700 |
| C | -1.14508200 | 3.25325100  | -1.87699700 |
| H | 0.57125600  | 1.98762700  | -1.55817700 |
| H | -0.71418000 | 3.76299700  | -2.73261200 |
| N | -0.90996600 | 1.56720200  | -0.19612700 |
| C | 2.18493300  | -2.74751200 | 3.54620100  |
| C | 1.73576700  | -1.57337200 | 2.95664800  |
| C | 0.85783400  | -1.57287100 | 1.85890600  |
| C | 0.45706800  | -2.84938000 | 1.38123700  |
| C | 0.93294300  | -4.03602500 | 1.95331900  |
| C | 1.79400500  | -3.99617800 | 3.04360200  |
| H | 2.06035600  | -0.62386900 | 3.37312400  |
| H | 0.63918800  | -5.00758300 | 1.56525200  |
| C | -0.47611900 | -2.84798500 | 0.25553400  |
| C | -1.07840100 | -3.98062900 | -0.30053000 |
| C | -1.97977500 | -3.87068900 | -1.35764000 |
| H | -0.87773100 | -4.95544700 | 0.13021200  |
| C | -1.62857900 | -1.49858500 | -1.25053400 |
| C | -2.24780300 | -2.58284800 | -1.84371900 |
| H | -1.81922800 | -0.48560400 | -1.59130700 |
| H | -2.92031100 | -2.42761800 | -2.68076400 |
| C | 3.48768300  | -0.52490700 | -1.95785100 |
| C | 2.26950200  | -0.62009900 | -1.31119600 |
| C | 2.85424900  | 1.00338900  | 0.25127900  |
| C | 4.10620700  | 1.13558000  | -0.35678800 |

|    |             |             |             |
|----|-------------|-------------|-------------|
| C  | 4.44675700  | 0.37832400  | -1.47583700 |
| H  | 3.68102200  | -1.13278800 | -2.83574900 |
| H  | 1.50394600  | -1.31119300 | -1.65030900 |
| H  | 4.83666600  | 1.81232000  | 0.07267900  |
| C  | 2.40161000  | 1.73888000  | 1.43106900  |
| C  | 3.18763000  | 2.72338000  | 2.04351200  |
| C  | 2.73290200  | 3.38034800  | 3.18051700  |
| H  | 4.16504100  | 2.99088300  | 1.65120800  |
| C  | 0.68244700  | 2.09096100  | 3.06434800  |
| C  | 1.47107700  | 3.04628200  | 3.69117300  |
| H  | -0.29089400 | 1.85895100  | 3.48736100  |
| N  | -0.76774000 | -1.61558800 | -0.23283300 |
| Ir | 0.11508300  | 0.00854600  | 0.86696800  |
| N  | 1.94856500  | 0.12170700  | -0.24433500 |
| C  | 1.11043200  | 1.40004200  | 1.91743100  |
| C  | 5.76682300  | 0.51613200  | -2.12591600 |
| C  | 6.40947300  | 1.75887300  | -2.19139700 |
| C  | 6.39423400  | -0.60405200 | -2.67702300 |
| C  | 7.65229800  | 1.86321100  | -2.80660600 |
| H  | 5.92428100  | 2.64340000  | -1.78950500 |
| C  | 7.63861400  | -0.50034100 | -3.30761900 |
| C  | 8.26578700  | 0.75123000  | -3.37024000 |
| H  | 8.14271500  | 2.83079400  | -2.86959000 |
| H  | 9.22901600  | 0.84332000  | -3.86225700 |
| C  | -2.64202400 | -5.06384600 | -1.92546300 |
| C  | -3.97254800 | -4.98775500 | -2.34650700 |
| C  | -1.95224200 | -6.27564600 | -2.05222700 |
| C  | -4.63231800 | -6.10641400 | -2.86694200 |
| C  | -2.59924200 | -7.38457100 | -2.58653400 |
| H  | -0.90907600 | -6.34046500 | -1.75711600 |
| C  | -3.92892300 | -7.31339300 | -2.98256400 |
| H  | -2.06404200 | -8.32498400 | -2.68609000 |
| H  | -4.43170500 | -8.18976200 | -3.37916000 |
| C  | -3.24831300 | 4.61192900  | -2.07543100 |
| C  | -2.63417700 | 5.76259800  | -2.57638900 |
| C  | -4.63716700 | 4.47304100  | -2.19168700 |
| C  | -3.37943400 | 6.76482900  | -3.20665900 |
| C  | -5.38216600 | 5.47242200  | -2.80824300 |
| H  | -5.12609000 | 3.57373600  | -1.82882900 |
| C  | -4.76729900 | 6.60775900  | -3.32145700 |
| H  | -6.45754300 | 5.35636400  | -2.91207900 |

|   |             |             |             |
|---|-------------|-------------|-------------|
| H | -5.35411100 | 7.37655400  | -3.81436800 |
| H | -4.51972600 | -4.05646900 | -2.23691600 |
| H | 2.85272300  | -2.71134200 | 4.40348100  |
| H | -1.56441300 | 5.90150600  | -2.45344900 |
| H | -3.48150700 | -1.09824300 | 4.50252100  |
| H | 5.92774500  | -1.58085000 | -2.59426700 |
| H | 1.11479700  | 3.55443100  | 4.58395500  |
| N | 8.24765200  | -1.64040600 | -3.86738700 |
| N | 3.53022200  | 4.37328200  | 3.81207200  |
| N | -5.98251300 | -6.02249700 | -3.26051500 |
| N | 2.26509800  | -5.19798100 | 3.63798800  |
| N | -5.43690700 | 0.54816900  | 3.73872000  |
| N | -2.74060100 | 7.91352800  | -3.71330700 |
| C | -6.58122200 | 0.47465000  | 2.92304700  |
| C | -7.71364900 | 1.25852800  | 3.19016600  |
| C | -6.60012800 | -0.37344400 | 1.80551300  |
| C | -8.83203300 | 1.18236400  | 2.36839900  |
| H | -7.70869500 | 1.92940800  | 4.04385000  |
| C | -7.71734400 | -0.42922100 | 0.98083700  |
| H | -5.72990500 | -0.98574500 | 1.58921100  |
| C | -8.84418700 | 0.34312500  | 1.25631200  |
| H | -9.69743500 | 1.80047900  | 2.59438700  |
| H | -7.70728500 | -1.09613700 | 0.12202800  |
| H | -9.71816100 | 0.29416600  | 0.61267000  |
| C | -5.53120900 | 0.75580200  | 5.12856900  |
| C | -6.57156800 | 0.18504200  | 5.87611200  |
| C | -4.56452900 | 1.52186900  | 5.79480700  |
| C | -6.64587600 | 0.39174900  | 7.24836900  |
| H | -7.31775400 | -0.42337400 | 5.37405400  |
| C | -4.63971000 | 1.70812000  | 7.17012100  |
| H | -3.75457000 | 1.96698000  | 5.22504800  |
| C | -5.68148300 | 1.15098000  | 7.90783800  |
| H | -7.45995200 | -0.06095300 | 7.80891800  |
| H | -3.87907400 | 2.30565000  | 7.66606100  |
| H | -5.73959800 | 1.30327400  | 8.98173800  |
| C | 3.64510400  | -5.36133000 | 3.86374500  |
| C | 4.11501100  | -6.05827800 | 4.98670800  |
| C | 4.57881600  | -4.80840900 | 2.97568400  |
| C | 5.47982900  | -6.20736000 | 5.20119600  |
| H | 3.40234500  | -6.47774300 | 5.69022400  |
| C | 5.94160500  | -4.94957700 | 3.20959600  |

|   |             |             |             |
|---|-------------|-------------|-------------|
| H | 4.22606700  | -4.26561300 | 2.10408600  |
| C | 6.40489000  | -5.65331900 | 4.31867600  |
| H | 5.82152000  | -6.75003600 | 6.07904300  |
| H | 6.64725800  | -4.51190100 | 2.50794200  |
| H | 7.47079300  | -5.76588500 | 4.49497400  |
| C | 1.34252400  | -6.20910500 | 3.97177300  |
| C | 1.66205400  | -7.56386500 | 3.80119100  |
| C | 0.07337500  | -5.87339400 | 4.46427500  |
| C | 0.73988100  | -8.55069600 | 4.13013800  |
| H | 2.63769600  | -7.83586000 | 3.40974400  |
| C | -0.84651000 | -6.86768100 | 4.77474200  |
| H | -0.18283400 | -4.82706800 | 4.60023300  |
| C | -0.52148300 | -8.21318200 | 4.61558000  |
| H | 1.00863400  | -9.59481900 | 3.99039400  |
| H | -1.82376000 | -6.58455200 | 5.15748300  |
| H | -1.24120100 | -8.98737700 | 4.86562900  |
| C | -6.43465300 | -6.74528700 | -4.38988700 |
| C | -7.65623200 | -7.42787200 | -4.35083300 |
| C | -5.66938200 | -6.78361900 | -5.56183700 |
| C | -8.10256500 | -8.12749100 | -5.46623400 |
| H | -8.25008200 | -7.40304800 | -3.44201600 |
| C | -6.11522600 | -7.50136400 | -6.66589200 |
| H | -4.72496300 | -6.24859200 | -5.59897400 |
| C | -7.33477600 | -8.17356200 | -6.62793300 |
| H | -9.05305300 | -8.65240700 | -5.41982500 |
| H | -5.50928100 | -7.52158600 | -7.56791800 |
| H | -7.68361300 | -8.72733800 | -7.49478400 |
| C | -6.89443900 | -5.22045900 | -2.53568100 |
| C | -7.85276100 | -4.45496700 | -3.21193900 |
| C | -6.85758900 | -5.18289000 | -1.13598400 |
| C | -8.75912900 | -3.67833900 | -2.49936200 |
| H | -7.88249900 | -4.47665100 | -4.29724900 |
| C | -7.75428600 | -4.38635100 | -0.43290000 |
| H | -6.12177000 | -5.77920600 | -0.60476800 |
| C | -8.71474600 | -3.63463300 | -1.10737600 |
| H | -9.49820800 | -3.09309600 | -3.04019600 |
| H | -7.71051600 | -4.36502100 | 0.65269600  |
| H | -9.42170200 | -3.02508400 | -0.55169000 |
| C | 9.64671900  | -1.82215000 | -3.77096800 |
| C | 10.37155600 | -2.31891700 | -4.86110900 |
| C | 10.32498300 | -1.51362500 | -2.58538100 |

|   |             |             |             |
|---|-------------|-------------|-------------|
| C | 11.74509800 | -2.50823800 | -4.76036000 |
| H | 9.84999900  | -2.55586000 | -5.78369100 |
| C | 11.70163900 | -1.68881400 | -2.50102400 |
| H | 9.76659700  | -1.13740400 | -1.73325400 |
| C | 12.42017900 | -2.19047500 | -3.58390400 |
| H | 12.29274200 | -2.89502400 | -5.61573400 |
| H | 12.21265700 | -1.44460400 | -1.57347000 |
| H | 13.49447300 | -2.33316000 | -3.51140100 |
| C | 4.87718000  | 4.08977900  | 4.10968700  |
| C | 5.87063100  | 5.07047200  | 3.97450600  |
| C | 5.25243400  | 2.80531500  | 4.52921000  |
| C | 7.19673000  | 4.77344500  | 4.26729000  |
| H | 5.59521100  | 6.06548200  | 3.63819200  |
| C | 6.58341700  | 2.51522400  | 4.80340500  |
| H | 4.49102500  | 2.03882300  | 4.63690000  |
| C | 7.56601800  | 3.49543100  | 4.68041400  |
| H | 7.95021000  | 5.54925000  | 4.15584900  |
| H | 6.85066800  | 1.51310000  | 5.12896700  |
| H | 8.60430700  | 3.26618000  | 4.90250700  |
| C | 2.96668400  | 5.63498100  | 4.08217400  |
| C | 2.01070500  | 6.18337000  | 3.21540600  |
| C | 3.32816900  | 6.35724200  | 5.22910700  |
| C | 1.43454800  | 7.41743900  | 3.49263000  |
| H | 1.72185600  | 5.63178100  | 2.32598600  |
| C | 2.75747600  | 7.59765400  | 5.48737800  |
| H | 4.05584000  | 5.93696100  | 5.91678500  |
| C | 1.80503300  | 8.13783700  | 4.62558100  |
| H | 0.69474800  | 7.82247000  | 2.80673800  |
| H | 3.05115100  | 8.13911800  | 6.38317700  |
| H | 1.35607100  | 9.10421700  | 4.83637600  |
| C | -3.35915300 | 9.18028900  | -3.60172200 |
| C | -3.30556000 | 10.08968300 | -4.66510700 |
| C | -4.02966300 | 9.54385100  | -2.42741500 |
| C | -3.90567400 | 11.33824700 | -4.54876500 |
| H | -2.79071000 | 9.81023700  | -5.57951000 |
| C | -4.64290000 | 10.78761700 | -2.32809900 |
| H | -4.06564300 | 8.84623300  | -1.59590200 |
| C | -4.58207200 | 11.69417700 | -3.38403400 |
| H | -3.85481700 | 12.03249800 | -5.38340300 |
| H | -5.15913300 | 11.05396600 | -1.40958200 |
| H | -5.05577800 | 12.66795300 | -3.29980500 |

|   |             |             |             |
|---|-------------|-------------|-------------|
| C | -1.46734200 | 7.80505100  | -4.31895300 |
| C | -0.47105100 | 8.75156600  | -4.05200900 |
| C | -1.18648800 | 6.75041600  | -5.19711600 |
| C | 0.77615100  | 8.64510500  | -4.65741800 |
| H | -0.68231900 | 9.56861600  | -3.36859000 |
| C | 0.06964200  | 6.64226800  | -5.78295800 |
| H | -1.95987100 | 6.02030100  | -5.41759100 |
| C | 1.05759900  | 7.58923600  | -5.52132200 |
| H | 1.53836600  | 9.38811700  | -4.43821100 |
| H | 0.27024300  | 5.81891200  | -6.46360300 |
| H | 2.03549700  | 7.50588500  | -5.98660300 |
| C | 7.45615600  | -2.61848000 | -4.51321400 |
| C | 7.69974700  | -3.98094200 | -4.30310000 |
| C | 6.41956400  | -2.23678100 | -5.37452100 |
| C | 6.92412000  | -4.93818900 | -4.94767000 |
| H | 8.49991300  | -4.28138100 | -3.63323200 |
| C | 5.63792500  | -3.20133500 | -6.00019700 |
| H | 6.23481500  | -1.18097200 | -5.55013200 |
| C | 5.88627000  | -4.55693200 | -5.79492600 |
| H | 7.12585500  | -5.99163800 | -4.77266000 |
| H | 4.83877200  | -2.88840500 | -6.66716500 |
| H | 5.27830700  | -5.30795900 | -6.29097800 |

**Table S11.** The Cartesian coordinates for the optimized structures for **2c** in the ground states ( $S_0$ )

|   |             |             |             |
|---|-------------|-------------|-------------|
| C | 1.15018800  | -3.36697800 | 3.22242800  |
| C | 1.08811700  | -2.08971900 | 2.65170300  |
| C | 0.19392900  | -1.77745800 | 1.61895800  |
| C | -0.65841300 | -2.82350000 | 1.16365500  |
| C | -0.62091500 | -4.09143900 | 1.76159400  |
| C | 0.26344400  | -4.36682600 | 2.78443800  |
| H | 1.77346200  | -1.32627900 | 3.00752100  |
| H | -1.28967400 | -4.88227500 | 1.42986400  |
| H | 0.28717200  | -5.34933700 | 3.24441100  |
| C | -1.52630800 | -2.51192500 | 0.03786100  |
| C | -2.47687000 | -3.37470000 | -0.52127700 |
| C | -3.25385300 | -2.98671500 | -1.61061000 |
| H | -2.63519500 | -4.34965900 | -0.07346600 |
| C | -2.10245400 | -0.88069600 | -1.52131800 |
| C | -3.04678500 | -1.69361700 | -2.11879500 |



|    |             |             |             |
|----|-------------|-------------|-------------|
| H  | -1.91732700 | 0.12615600  | -1.88291800 |
| H  | -3.59647800 | -1.33470500 | -2.98257100 |
| N  | -1.35558700 | -1.26773300 | -0.48084300 |
| C  | 2.30078000  | 2.49869500  | 3.33845100  |
| C  | 1.26170700  | 1.74932800  | 2.77293900  |
| C  | 1.44178700  | 0.96998600  | 1.62545100  |
| C  | 2.75314600  | 0.91600000  | 1.07622300  |
| C  | 3.79491100  | 1.66526100  | 1.64176900  |
| C  | 3.57788900  | 2.46235000  | 2.74828100  |
| H  | 0.28253400  | 1.77599700  | 3.23988300  |
| H  | 4.79183700  | 1.64673500  | 1.20699700  |
| H  | 4.38480400  | 3.05787800  | 3.16197800  |
| C  | 2.93455500  | 0.03587500  | -0.06780400 |
| C  | 4.15170900  | -0.23384100 | -0.70470200 |
| C  | 4.22755000  | -1.12822400 | -1.77051400 |
| H  | 5.05871000  | 0.22801500  | -0.32994300 |
| C  | 1.86055900  | -1.44595900 | -1.51074400 |
| C  | 3.03440400  | -1.75098600 | -2.17357600 |
| H  | 0.91748200  | -1.90446800 | -1.79243600 |
| H  | 3.01782800  | -2.44445600 | -3.00788700 |
| C  | 0.07939300  | 3.40278500  | -2.17694900 |
| C  | 0.37336500  | 2.22232900  | -1.52090200 |
| C  | -1.43265000 | 2.45466700  | -0.06936600 |
| C  | -1.77469900 | 3.65915300  | -0.69431600 |
| C  | -1.02892000 | 4.15830500  | -1.76148700 |
| H  | 0.69044400  | 3.71766400  | -3.01632400 |
| H  | 1.22184200  | 1.61229400  | -1.81555100 |
| H  | -2.61253700 | 4.23348300  | -0.31450200 |
| C  | -2.12620400 | 1.86090500  | 1.06695500  |
| C  | -3.29893600 | 2.40950800  | 1.60607400  |
| C  | -3.91616100 | 1.82569500  | 2.69550300  |
| H  | -3.73987000 | 3.30764700  | 1.17932200  |
| C  | -2.18344000 | 0.12676000  | 2.73050600  |
| C  | -3.35060900 | 0.67653200  | 3.26790000  |
| H  | -4.82278500 | 2.24811400  | 3.11768300  |
| H  | -1.77703400 | -0.77017600 | 3.18944000  |
| N  | 1.79733500  | -0.57383700 | -0.49780000 |
| Ir | 0.03973200  | -0.04505500 | 0.60661900  |
| N  | -0.35607400 | 1.74929200  | -0.50364700 |
| C  | -1.54545800 | 0.68099700  | 1.61292900  |
| C  | -1.38314200 | 5.42964200  | -2.41645300 |

|   |             |             |             |
|---|-------------|-------------|-------------|
| C | -2.71885700 | 5.83145300  | -2.55512600 |
| C | -0.39432700 | 6.28591100  | -2.91991000 |
| C | -3.05550300 | 7.02665500  | -3.17075700 |
| H | -3.51417100 | 5.17492000  | -2.21179000 |
| C | -0.71790800 | 7.49263400  | -3.52009800 |
| C | -2.05785500 | 7.88351500  | -3.65911700 |
| H | -4.09920100 | 7.30155600  | -3.28706100 |
| H | 0.06992900  | 8.14967700  | -3.87495500 |
| C | 5.51000100  | -1.41962000 | -2.43476200 |
| C | 5.80658300  | -2.70470000 | -2.90829200 |
| C | 6.48254100  | -0.42581400 | -2.60948800 |
| C | 7.02144100  | -2.99311800 | -3.51037800 |
| C | 7.69127400  | -0.69621500 | -3.23101400 |
| H | 6.27195500  | 0.59107500  | -2.28838700 |
| C | 7.98704700  | -1.99040700 | -3.68551500 |
| H | 7.23601400  | -4.00582000 | -3.83684300 |
| H | 8.41559500  | 0.09926300  | -3.37515200 |
| C | -4.25564400 | -3.89277600 | -2.20218400 |
| C | -5.45832100 | -3.40027100 | -2.72630500 |
| C | -4.04208100 | -5.27636200 | -2.26181700 |
| C | -6.40445900 | -4.24507500 | -3.28598300 |
| C | -4.98476500 | -6.13185700 | -2.81109000 |
| H | -3.11251100 | -5.69235800 | -1.88241400 |
| C | -6.18424400 | -5.62907100 | -3.33526700 |
| H | -7.32793200 | -3.83672900 | -3.68461300 |
| H | -4.79417700 | -7.20011300 | -2.84151800 |
| N | -3.97293000 | 0.07660300  | 4.39112500  |
| N | 2.08358800  | 3.29585900  | 4.48061100  |
| N | 2.10070300  | -3.68308100 | 4.21642200  |
| C | 3.13147900  | 3.50137800  | 5.41019200  |
| C | 3.92402200  | 2.42980900  | 5.83786900  |
| C | 3.38354500  | 4.78204400  | 5.91686400  |
| C | 4.95587500  | 2.64408500  | 6.74506800  |
| H | 3.72291200  | 1.43191300  | 5.46035600  |
| C | 4.40592500  | 4.98303500  | 6.83751900  |
| H | 2.77046200  | 5.61434100  | 5.58350000  |
| C | 5.20220200  | 3.91791600  | 7.25333400  |
| H | 5.56231800  | 1.80065900  | 7.06577500  |
| H | 4.58908600  | 5.98347600  | 7.22109700  |
| H | 6.00546800  | 4.07912500  | 7.96691500  |
| C | 0.82062500  | 3.86950900  | 4.74612100  |

|   |             |             |            |
|---|-------------|-------------|------------|
| C | 0.32538000  | 3.90727300  | 6.05660400 |
| C | 0.04809500  | 4.42115800  | 3.71570700 |
| C | -0.91153100 | 4.48341400  | 6.32592600 |
| H | 0.91981600  | 3.48417500  | 6.86100700 |
| C | -1.19530500 | 4.97664800  | 3.99203900 |
| H | 0.42268500  | 4.39680700  | 2.69722900 |
| C | -1.68422000 | 5.01598100  | 5.29636500 |
| H | -1.27839700 | 4.50195500  | 7.34905200 |
| H | -1.78343800 | 5.38944000  | 3.17673100 |
| H | -2.65518500 | 5.45467200  | 5.50761700 |
| C | -3.20382600 | -0.19468400 | 5.54280800 |
| C | -3.37876900 | -1.38956300 | 6.25301800 |
| C | -2.25916400 | 0.73539200  | 5.99347300 |
| C | -2.63378400 | -1.63847500 | 7.39962500 |
| H | -4.10219200 | -2.11744300 | 5.89769000 |
| C | -1.51308200 | 0.47245500  | 7.13668600 |
| H | -2.12127700 | 1.66700700  | 5.45230600 |
| C | -1.69609900 | -0.71076800 | 7.85023400 |
| H | -2.77930600 | -2.57165000 | 7.93765900 |
| H | -0.79449100 | 1.21435800  | 7.47610500 |
| H | -1.11389300 | -0.90967200 | 8.74570600 |
| C | -5.35577300 | -0.17768300 | 4.37047800 |
| C | -5.98628700 | -0.55527800 | 3.17555100 |
| C | -6.13269400 | -0.05389400 | 5.53185700 |
| C | -7.35491200 | -0.79370600 | 3.14775200 |
| H | -5.39146300 | -0.66303900 | 2.27357400 |
| C | -7.49800400 | -0.31094600 | 5.49472600 |
| H | -5.65872100 | 0.24694100  | 6.46107100 |
| C | -8.12244100 | -0.67852600 | 4.30483400 |
| H | -7.82209400 | -1.08728200 | 2.21096700 |
| H | -8.08093200 | -0.20762200 | 6.40660600 |
| H | -9.19093800 | -0.87277200 | 4.28001400 |
| C | 2.50600800  | -2.73486900 | 5.18100300 |
| C | 3.85074000  | -2.65661400 | 5.56781100 |
| C | 1.57520800  | -1.87797800 | 5.78168700 |
| C | 4.24943500  | -1.75730500 | 6.54966800 |
| H | 4.57857800  | -3.30985200 | 5.09620900 |
| C | 1.98852200  | -0.96803800 | 6.74727600 |
| H | 0.52970100  | -1.92739900 | 5.49275600 |
| C | 3.32234600  | -0.90607900 | 7.14693800 |
| H | 5.29643100  | -1.71704700 | 6.84011500 |

|   |              |              |             |
|---|--------------|--------------|-------------|
| H | 1.24952900   | -0.31267100  | 7.19823400  |
| H | 3.63395000   | -0.19774100  | 7.90955600  |
| C | 2.70592600   | -4.96106100  | 4.21793400  |
| C | 3.14006100   | -5.54473400  | 3.02099100  |
| C | 2.88493900   | -5.66034000  | 5.41832100  |
| C | 3.72954500   | -6.80367600  | 3.02807500  |
| H | 3.00924500   | -5.00154900  | 2.08986400  |
| C | 3.49072700   | -6.91151500  | 5.41769700  |
| H | 2.54692100   | -5.21215800  | 6.34796100  |
| C | 3.91271900   | -7.49408700  | 4.22438400  |
| H | 4.06164900   | -7.24128500  | 2.09003600  |
| H | 3.62062500   | -7.44057200  | 6.35835800  |
| H | 4.37963300   | -8.47501600  | 4.22698200  |
| H | -5.66628500  | -2.33450100  | -2.68105000 |
| N | -7.14341700  | -6.49112000  | -3.89613900 |
| C | -6.73708900  | -7.63257200  | -4.62626200 |
| C | -7.39694100  | -8.85511600  | -4.45280900 |
| C | -5.67662100  | -7.55378500  | -5.53737000 |
| C | -7.00525700  | -9.97148300  | -5.18283200 |
| H | -8.21708500  | -8.92130200  | -3.74414300 |
| C | -5.28041100  | -8.68032800  | -6.24911300 |
| H | -5.16758700  | -6.60542600  | -5.68229800 |
| C | -5.94312400  | -9.89414400  | -6.08097500 |
| H | -7.52774700  | -10.91307600 | -5.03608800 |
| H | -4.45539400  | -8.60235000  | -6.95229900 |
| H | -5.63538900  | -10.77036400 | -6.64428700 |
| C | -8.52353200  | -6.22786600  | -3.72865200 |
| C | -9.02221700  | -5.80433300  | -2.49068400 |
| C | -9.40975200  | -6.39629400  | -4.79928100 |
| C | -10.37915400 | -5.54490300  | -2.33496000 |
| H | -8.34002700  | -5.68127800  | -1.65468100 |
| C | -10.76768800 | -6.15220300  | -4.62845300 |
| H | -9.02582400  | -6.72126000  | -5.76173200 |
| C | -11.26093100 | -5.72070100  | -3.39913600 |
| H | -10.75027400 | -5.21732500  | -1.36745200 |
| H | -11.44257300 | -6.28816700  | -5.46940600 |
| H | -12.32153900 | -5.52437100  | -3.27135900 |
| H | 0.65359500   | 6.02504000   | -2.79722700 |
| N | -2.39360700  | 9.10264600   | -4.27117600 |
| C | -1.61485300  | 9.60469000   | -5.34079700 |
| C | -1.27745400  | 10.96231500  | -5.39234900 |

|   |             |             |             |
|---|-------------|-------------|-------------|
| C | -1.17932600 | 8.75407100  | -6.36411100 |
| C | -0.52441800 | 11.45616400 | -6.45141900 |
| H | -1.61055400 | 11.62396500 | -4.59833900 |
| C | -0.41119000 | 9.25387800  | -7.40951500 |
| H | -1.44757000 | 7.70215000  | -6.33262100 |
| C | -0.08226200 | 10.60663200 | -7.46311100 |
| H | -0.27044200 | 12.51255000 | -6.47668900 |
| H | -0.08085600 | 8.58079600  | -8.19627900 |
| H | 0.51179800  | 10.99482600 | -8.28539500 |
| C | -3.50079000 | 9.85336300  | -3.80857600 |
| C | -4.37022800 | 10.46337200 | -4.72053100 |
| C | -3.73535400 | 10.00405500 | -2.43653600 |
| C | -5.44814200 | 11.21354100 | -4.26443900 |
| H | -4.19237300 | 10.34600400 | -5.78537400 |
| C | -4.82649200 | 10.74098000 | -1.99039300 |
| H | -3.05730300 | 9.54115000  | -1.72564300 |
| C | -5.68682900 | 11.35340100 | -2.89906500 |
| H | -6.11397300 | 11.68102300 | -4.98502000 |
| H | -4.99469600 | 10.84896200 | -0.92215400 |
| H | -6.53404100 | 11.93456800 | -2.54661500 |
| H | 5.09034300  | -3.50849900 | -2.75872100 |
| N | 9.22039700  | -2.27194000 | -4.29491600 |
| C | 10.39368600 | -1.59361000 | -3.88318000 |
| C | 10.66628100 | -1.39762100 | -2.52426300 |
| C | 11.30266900 | -1.12211800 | -4.83724900 |
| C | 11.82194600 | -0.73089800 | -2.13268500 |
| H | 9.96782900  | -1.77087900 | -1.78109100 |
| C | 12.46442800 | -0.47265800 | -4.43569600 |
| H | 11.09129800 | -1.27200600 | -5.89190100 |
| C | 12.72927500 | -0.26828200 | -3.08330900 |
| H | 12.02018200 | -0.58640800 | -1.07396300 |
| H | 13.16075900 | -0.11243700 | -5.18832600 |
| H | 13.63444000 | 0.24564800  | -2.77291300 |
| C | 9.32050300  | -3.26115800 | -5.30191100 |
| C | 10.38774800 | -4.16703200 | -5.29309600 |
| C | 8.36621100  | -3.34147600 | -6.32337500 |
| C | 10.49821100 | -5.12878200 | -6.29060800 |
| H | 11.12789600 | -4.10938600 | -4.50059600 |
| C | 8.47549000  | -4.31844500 | -7.30663100 |
| H | 7.54195600  | -2.63445900 | -6.33941000 |
| C | 9.54209600  | -5.21480700 | -7.30002100 |

|   |             |             |             |
|---|-------------|-------------|-------------|
| H | 11.33267500 | -5.82468700 | -6.26905000 |
| H | 7.72688100  | -4.36771900 | -8.09298900 |
| H | 9.62748600  | -5.97171300 | -8.07435600 |

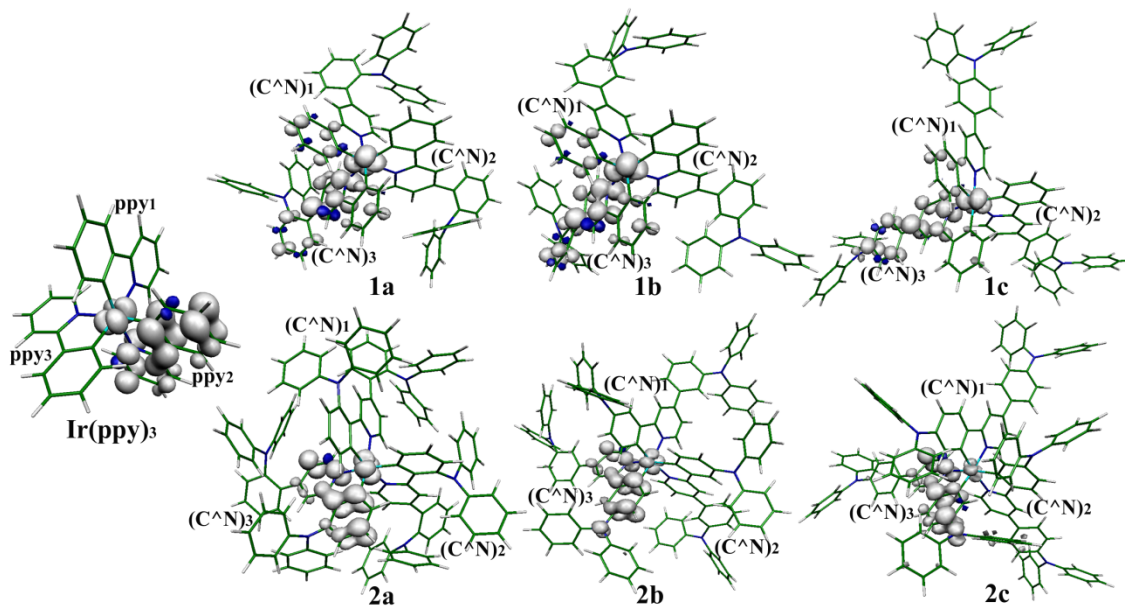

**Figure S1.** Spin-density contours of the studied complexes in the triplet electronic configuration.

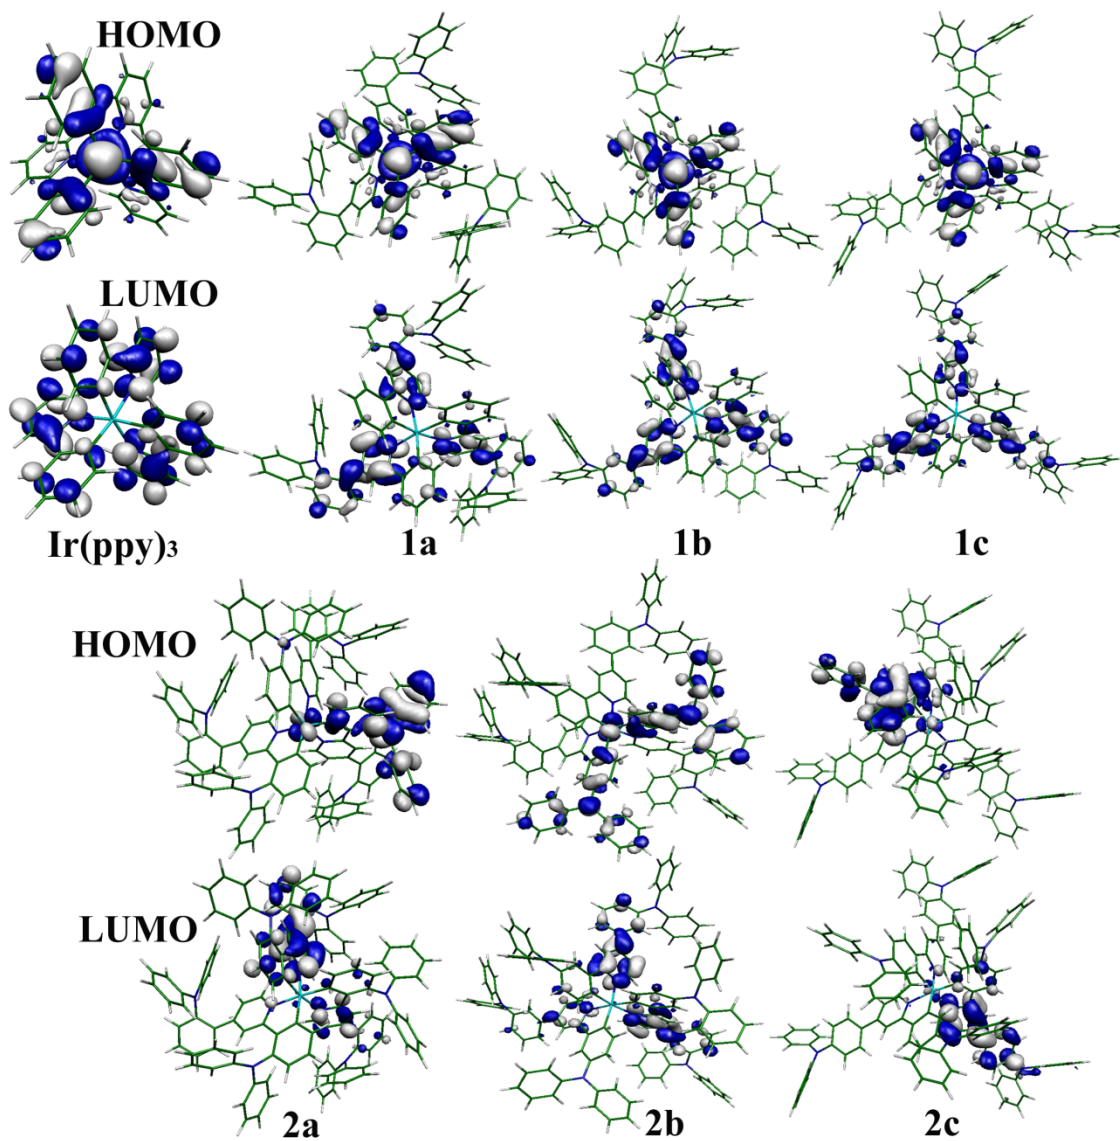

**Figure S2.** Contour plots of HOMO and LUMO for the studied complexes obtained from DFT calculations at their  $S_0$  optimized geometries.
